# Supplementary material for: Associations of ClivD score with Dementia, Cardiovascular Disease, Cancer, and Mortality in the General Population using data from UK Biobank: a prospective cohort study
Source: Research Square preprint supplement (doi:10.21203/rs.3.rs-7640138/v1), 2025-09-30
Supplement: Supplementary file 1 [file 8fecc592072e3241375dc62e.docx]

**Supplementary Material for:**

ClivD score and risks of dementia, cardiovascular disease, cancer, and mortality

**Author:**

Guozhe Sun, MD, PhD1*, Jie Chen, MS1*, Hongmei Yang, PhD1*, Caiyu Zhang, MS1*, Chenhua He, MS1*, Lin Guan, MD, PhD3, Ying Zhou, MD1, Shiyu Zhou, PhD2, Yao Yu, MD1, Jun Wang, MD1, Xiangyu Tan, MD1, Yangzhi Yin, MD1, Ziyi Xie, MD1, Wei Miao, MD1, Wenhang Li, MS1, Yifei Chen, BS1, Xiaoxuan Tian, MS1, Tianhao Li, BS1, Xiaobing Zhou, BS1, Mengling Lu, BS1, Guangxiao Li, MD, PhD4, Xiaofan Guo, MD, PhD1#

1Department of Cardiology, the First Hospital of China Medical University, Shenyang, Liaoning, China.

2Department of Clinical Epidemiology and Evidence-Based Medicine, The First Hospital of China Medical University, Shenyang, China.

3Department of Gastroenterology, the First Hospital of China Medical University, Shenyang, Liaoning, China.

4Department of Medical Record Management Center, the First Hospital of China Medical University, Shenyang, China.

Supplementary Appendix

**Supplementary methods**

**Supplemental Tables**

Table S1. Mortality, cardiovascular disease, hypertension, diatetes, dementia, and cancer ascertainment.

Table S2. Covariate definitions.

Table S3. Baseline characteristics of participants according to ClivDnonlab quartiles.

Table S4. Association of the ClivDnonlab score with dementia, cardiovascular disease, cancer, and all-cause mortality.

Table S5. Association of the ClivDlab with Alzheimer's disease, vascular dementia, coronary heart disease, heart failure and stroke.

Table S6. Association of the ClivDnonlab with Alzheimer's disease, vascular dementia, coronary heart disease, heart failure and stroke.

Table S7. Association of the ClivDlab with dementia, cardiovascular disease, cancer and all-cause mortality (exclusion of participants with diseases and death events in the first 2 years of follow up).

Table S8. Association of the ClivDnonlab with dementia, cardiovascular disease, cancer and all-cause mortality (exclusion of participants with diseases and death events in the first 2 years of follow up).

Table S9. Association of the ClivDlab with Alzheimer's disease, vascular dementia, coronary heart disease, heart failure and stroke (exclusion of participants with diseases and death events in the first 2 years of follow up).

Table S10. Association of the ClivDnonlab with Alzheimer's disease, vascular dementia, coronary heart disease, heart failure and stroke (exclusion of participants with diseases and death events in the first 2 years of follow up).

Table S11. Association of the ClivDlab with dementia, cardiovascular disease, and cancer (Treating death as a competing risk).

Table S12. Association of the ClivDnonlab with dementia, cardiovascular disease, and cancer (Treating death as a competing risk).

Table S13. Association of the ClivDlab with Alzheimer's disease, vascular dementia, coronary heart disease, heart failure and stroke (Treating death as a competing risk).

Table S14. Association of the ClivDnonlab with Alzheimer's disease, vascular dementia, coronary heart disease, heart failure and stroke (Treating death as a competing risk).

**Supplemental Figures**

Figure S1. Kaplan-Meier survival curves of ClivDnonlab for (A) dementia, (B) cardiovascular diseases, (C) cancer, and (D) all-cause mortality.

Figure S2. Kaplan-Meier survival curves of ClivDlab for (A) coronary heart disease, (B) heart failure, (C) stroke, (D) vascular dementia, and (E) Alzheimer's disease.

Figure S3. Kaplan-Meier survival curves of ClivDnonlab for (A) coronary heart disease, (B) heart failure, (C) stroke, (D) vascular dementia, and (E) Alzheimer's disease.

Figure S4. Restricted cubic spline curve for the association of ClivDnonlab with (A) dementia, (B) cardiovascular diseases, (C) cancer, and (D) all-cause mortality.

Figure S5. Restricted cubic spline curve for the association of ClivDlab with (A) coronary heart disease, (B) heart failure, (C) stroke, (D) vascular dementia, and (E) Alzheimer's disease.

Figure S6. Restricted cubic spline curve for the association of ClivDnonlab with (A) coronary heart disease, (B) heart failure, (C) stroke, (D) vascular dementia, and (E) Alzheimer's disease.

Figure S7. Forest plot of all-cause mortality according to subgroups (ClivDlab)

|Figure S8. Forest plot of all-cause mortality according to subgroups (ClivDnonlab)

Figure S9. Forest plot of all-cause dementia according to subgroups (ClivDlab).

Figure S10. Forest plot of all-cause dementia according to subgroups (ClivDnonlab).

Figure S11. Forest plot of total cardiovascular diseases according to subgroups (ClivDlab).

Figure S12. Forest plot of total cardiovascular diseases according to subgroups (ClivDnonlab).

Figure S13. Forest plot of cancer according to subgroups (ClivDlab).

Figure S14. Forest plot of cancer according to subgroups (ClivDnonlab).

Figure S15. Forest plot of Alzheimer's disease according to subgroups (ClivDlab).

Figure S16. Forest plot of Alzheimer's disease according to subgroups (ClivDnonlab).

Figure S17. Forest plot of vascular dementia according to subgroups (ClivDlab).

Figure S18. Forest plot of vascular dementia according to subgroups (ClivDnonlab).

Figure S19. Forest plot of coronary heart disease according to subgroups (ClivDlab).

Figure S20. Forest plot of coronary heart disease according to subgroups (ClivDnonlab).

Figure S21. Forest plot of heart failure according to subgroups (ClivDlab).

Figure S22. Forest plot of heart failure according to subgroups (ClivDnonlab).

Figure S23. Forest plot of stroke according to subgroups (ClivDlab).

Figure S24. Forest plot of stroke according to subgroups (ClivDnonlab).

**Supplementary methods**

The Chronic Liver Disease (CLivD) risk prediction score

The equation in R software language

data = name of the R data

AGE = age in years

SEX = men = 1; women = 2

WHR = waist hip ratio

ALCOHOL = number of weekly drinks (1 drink = 10 g ethanol)

Set to = 50, if >50 drinks per week

GGT = gamma glutamyltransferase (U/L)

Set to = 200 U/L if >200 U/L

DIABETES = yes = 1; no = 0

SMOKING = current smoker = 1; never/previous smoker = 2

*CLivDlab*

data$modellab <- (-6.7922721 + 0.044744302* data$AGE + 0.32961593*( data$WHR*10) + 0.19860813* data$ALCOHOL - 0.0082096868*pmax(data$ALCOHOL-0.1,0)^3 +0.010575035*pmax(data$ALCOHOL-1,0)^3 -0.002004756*pmax(data$ALCOHOL-3,0)^3 -0.00033998925*pmax(data$ALCOHOL-9,0)^3 -2.0602882e-05*pmax(data$ALCOHOL-33,0)^3 +0.011813962* data$GGT +0.18721469*(data$SEX=="2") +0.55249734*(data$DIABETES=="1") + 0.74679941*(data$SMOKING=="1") +0.0054325769* data$GGT*(data$SEX=="2") -0.64903176*( data$SEX=="2")*( data$SMOKING=="1"))

*CLivDnon-lab*

data$modelnonlab <- (-8.0940103 +0.044177151* data$AGE +0.48927753*( data$WHR*10) +0.19222894* data$ALCOHOL -0.00015029544*pmax(data$ALCOHOL-0.1,0)^3 -0.0021265611*pmax(data$ALCOHOL-1,0)^3 +0.0029832769*pmax(data$ALCOHOL-3,0)^3 -0.00068765143*pmax(data$ALCOHOL-9,0)^3 -1.8769011e-05*pmax(data$ALCOHOL-33,0)^3 +0.69669285*(data$DIABETES=="1") +0.75968055*(data$SMOKING=="1")+ 0.63248362*(data$SEX=="2") -0.59146649*(data$SMOKING=="1")*(data$SEX=="2"))

Weekly alcohol consumption: The variable was created by calculating total alcohol content for each reported drink using British measurements (1 pint of beer or cider=16g, 1 standard glass of white/red wine=16.8g, 1 glass of fortified wine=14.08g, 1 shot of spirits or liquor=8g, 1 glass of other alcohol drinks (i.e. alcopops)=12g)1,2.

**Table S1. Mortality, cardiovascular disease, hypertension, diatetes, dementia, and cancer ascertainment.**

| **Diseases** | **ICD-10 codes** |
| --- | --- |
| Death registry | Mortality data were provided by the NHS Digital for participants in England and Wales. Data were provided by the NHSCR for participants in Scotland.  Linkage for England, Wales were available up to May 31st, 2024  Linkage for Scotland was available up to December 31st, 2022 |
| Inpatient hospitalization | The inpatient hospitalization data were provided by either the Hospital Episode Statistics for England, the Patient Episode Database for Wales, or the Scottish Morbidity Record for Scotland.  Linkage for England was available up to October 31st, 2022 Linkage for Scotland was available up to August 31st, 2022 Linkage for Wales was available up to May 31st, 2022 |
| Cardiovascular Disease | I20-I25 for coronary heart disease I60-I64 for stroke I11.0, I13.0, I13.2, I50 for heart failure |
| Diabetes | E11 for Type 2 Diabetes |
| Dementia | F00, F00.0, F00.1, F00.2, F00.9, G30, G30.0, G30.1, G30.8, G30.9 for AD F01, F01.0, F01.1, F01.2, F01.3, F01.8, F01.9, I67.3 for VaD A81.0, F00, F01, F02, F03, F05.1, F10.6, G30, G31.0, G31.1, G31.8, I67.3 for all-cause dementia |
| Cancer | C00-C97 |

**Table S2. Covariate definitions.**

| **Variable** | **Definition** | **UK Biobank field ID** |
| --- | --- | --- |
| Ethnicity | White/Other | 21000 |
| Education | College or higher/Other | 6138 |
| TDI | Continuous | 189 |
| Vegetable serving | Servings/d | 1289, 1299 |
| Fruit serving | Servings/d | 1309, 1319 |
| Sedentary duration | Hours spent sleeping | 1070, 1080, 1090 |
| BMI | Underweight, normal weight, overweight, obese | 21001 |
| Cholesterol medication | Yes/No | 6177, 6153 |
| Blood pressure medication | Yes/No | 6177, 6153 |
| LDL | Continuous | 30780 |
| TG | Continuous | 30870 |
| SBP | Continuous | 4079 |
| DBP | Continuous | 4080 |

**Table S3. Baseline characteristics of participants according to ClivDnonlab quartiles.**

| **Characteristic** | **Overall**  N = 844691 | **Q1**  N = 211181 | **Q2**  N = 211171 | **Q3**  N = 211171 | **Q4**  N = 211171 | **p-value**2 |
| --- | --- | --- | --- | --- | --- | --- |
| **Age (years)** | 56.20 ± 8.03 | 50.29 ± 7.24 | 56.01 ± 7.45 | 58.44 ± 7.13 | 60.05 ± 6.66 | <0.001 |
| **Ethnicity, %** |  |  |  |  |  | <0.001 |
| Other | 3,405.00 (4.03%) | 1,272.00 (6.02%) | 858.00 (4.06%) | 683.00 (3.23%) | 592.00 (2.80%) |  |
| White | 81,064.00 (95.97%) | 19,846.00 (93.98%) | 20,259.00 (95.94%) | 20,434.00 (96.77%) | 20,525.00 (97.20%) |  |
| **Townsend Deprivation Index** | -1.50 ± 2.73 | -1.53 ± 2.69 | -1.61 ± 2.67 | -1.57 ± 2.70 | -1.28 ± 2.86 | <0.001 |
| **Education, %** |  |  |  |  |  | <0.001 |
| College | 32,472.00 (38.44%) | 9,350.00 (44.28%) | 8,308.00 (39.34%) | 7,731.00 (36.61%) | 7,083.00 (33.54%) |  |
| Other | 51,997.00 (61.56%) | 11,768.00 (55.72%) | 12,809.00 (60.66%) | 13,386.00 (63.39%) | 14,034.00 (66.46%) |  |
| **Vegetable servings/d** | 4.97 ± 3.20 | 4.79 ± 3.10 | 5.01 ± 3.22 | 5.04 ± 3.14 | 5.04 ± 3.35 | <0.001 |
| **Fruit servings/d** | 2.94 ± 2.42 | 3.01 ± 2.44 | 3.12 ± 2.45 | 3.01 ± 2.42 | 2.62 ± 2.32 | <0.001 |
| **Sedentary duration/d** | 4.83 ± 2.37 | 4.42 ± 2.30 | 4.71 ± 2.29 | 4.93 ± 2.30 | 5.25 ± 2.49 | <0.001 |
| **Body mass index,** **kg/m²** | 26.90 ± 4.31 | 25.38 ± 3.97 | 26.49 ± 4.16 | 27.36 ± 4.21 | 28.36 ± 4.32 | <0.001 |
| **Cholesterol medication, %** | 11,264.00 (13.34%) | 836.00 (3.96%) | 1,994.00 (9.44%) | 3,177.00 (15.04%) | 5,257.00 (24.89%) | <0.001 |
| **Blood pressure medication, %** | 14,020.00 (16.60%) | 1,345.00 (6.37%) | 2,804.00 (13.28%) | 3,987.00 (18.88%) | 5,884.00 (27.86%) | <0.001 |
| **Diabetes medication, %** | 546.00 (0.65%) | 23.00 (0.11%) | 63.00 (0.30%) | 160.00 (0.76%) | 300.00 (1.42%) | <0.001 |
| **LDL, mmol/L** | 3.61 ± 0.84 | 3.50 ± 0.79 | 3.66 ± 0.82 | 3.68 ± 0.85 | 3.59 ± 0.89 | <0.001 |
| **TG, mmol/L** | 1.69 ± 0.99 | 1.42 ± 0.83 | 1.63 ± 0.92 | 1.77 ± 0.97 | 1.95 ± 1.12 | <0.001 |
| **HbA1c (%)** | 35.40 ± 5.79 | 33.94 ± 4.33 | 34.91 ± 4.70 | 35.70 ± 5.64 | 37.04 ± 7.50 | <0.001 |
| **Systolic blood pressure, mmHg** | 138.11 ± 18.42 | 130.54 ± 17.09 | 136.83 ± 17.83 | 140.49 ± 17.98 | 144.57 ± 17.82 | <0.001 |
| **Diastolic blood pressure, mmHg** | 82.58 ± 9.99 | 79.69 ± 9.82 | 82.00 ± 9.86 | 83.52 ± 9.76 | 85.10 ± 9.71 | <0.001 |
| 1Mean ± SD; n (%) | | | | | | |
| 2Kruskal-Wallis rank sum test; Pearson's Chi-squared test | | | | | | |
| Abbreviations: LDL, low-density lipoprotein; TG, triglyceride; HbA1c, glycated hemoglobin; | | | | | | |

**Table S4. Association of the ClivDnonlab score with dementia, cardiovascular disease, cancer, and all-cause mortality.**

|  | | Model 1 | | | Model 2 | | | Model 3 | | | Model 4 | | |
| --- | --- | --- | --- | --- | --- | --- | --- | --- | --- | --- | --- | --- | --- |
|  | **Group** | **HR** | **95% CI** | **p-value** | **HR** | **95% CI** | **p-value** | **HR** | **95% CI** | **p-value** | **HR** | **95% CI** | **p-value** |
| **Dementia** | Q1 | — | — |  | — | — |  | — | — |  | — | — |  |
|  | Q2 | 2.42 | 1.89, 3.10 | <0.001 | 2.37 | 1.85, 3.04 | <0.001 | 2.42 | 1.88, 3.10 | <0.001 | 2.10 | 1.64, 2.70 | <0.001 |
|  | Q3 | 3.39 | 2.67, 4.30 | <0.001 | 3.28 | 2.59, 4.17 | <0.001 | 3.43 | 2.70, 4.37 | <0.001 | 2.74 | 2.15, 3.50 | <0.001 |
|  | Q4 | 4.51 | 3.58, 5.69 | <0.001 | 4.29 | 3.40, 5.41 | <0.001 | 4.65 | 3.67, 5.90 | <0.001 | 3.31 | 2.59, 4.23 | <0.001 |
| **CVD** | Q1 | — | — |  | — | — |  | — | — |  | — | — |  |
|  | Q2 | 1.89 | 1.75, 2.05 | <0.001 | 1.88 | 1.73, 2.03 | <0.001 | 1.79 | 1.66, 1.94 | <0.001 | 1.56 | 1.44, 1.69 | <0.001 |
|  | Q3 | 2.53 | 2.34, 2.72 | <0.001 | 2.49 | 2.31, 2.68 | <0.001 | 2.30 | 2.13, 2.48 | <0.001 | 1.83 | 1.69, 1.98 | <0.001 |
|  | Q4 | 3.83 | 3.56, 4.12 | <0.001 | 3.73 | 3.47, 4.01 | <0.001 | 3.32 | 3.08, 3.57 | <0.001 | 2.36 | 2.18, 2.54 | <0.001 |
| **Cancer** | Q1 | — | — |  | — | — |  | — | — |  | — | — |  |
|  | Q2 | 1.40 | 1.33, 1.47 | <0.001 | 1.38 | 1.32, 1.46 | <0.001 | 1.39 | 1.32, 1.46 | <0.001 | 1.32 | 1.26, 1.39 | <0.001 |
|  | Q3 | 1.70 | 1.62, 1.79 | <0.001 | 1.67 | 1.59, 1.76 | <0.001 | 1.69 | 1.60, 1.77 | <0.001 | 1.56 | 1.48, 1.64 | <0.001 |
|  | Q4 | 2.11 | 2.01, 2.21 | <0.001 | 2.08 | 1.98, 2.18 | <0.001 | 2.11 | 2.01, 2.22 | <0.001 | 1.86 | 1.76, 1.95 | <0.001 |
| **All-cause mortality** | Q1 | — | — |  | — | — |  | — | — |  | — | — |  |
|  | Q2 | 1.88 | 1.68, 2.10 | <0.001 | 1.86 | 1.66, 2.07 | <0.001 | 1.83 | 1.63, 2.04 | <0.001 | 1.69 | 1.51, 1.89 | <0.001 |
|  | Q3 | 2.61 | 2.34, 2.90 | <0.001 | 2.54 | 2.29, 2.83 | <0.001 | 2.47 | 2.22, 2.75 | <0.001 | 2.16 | 1.94, 2.41 | <0.001 |
|  | Q4 | 4.46 | 4.04, 4.93 | <0.001 | 4.27 | 3.87, 4.72 | <0.001 | 4.08 | 3.68, 4.52 | <0.001 | 3.28 | 2.95, 3.64 | <0.001 |
|  | | | | | | | | | | | | | |

**Table S5. Association of the ClivDlab with Alzheimer's disease, vascular dementia, coronary heart disease, heart failure and stroke.**

|  | | Model 1 | | | Model 2 | | | Model 3 | | | Model 4 | | |
| --- | --- | --- | --- | --- | --- | --- | --- | --- | --- | --- | --- | --- | --- |
| **Group** | **Characteristic** | **HR** | **95% CI** | **p-value** | **HR** | **95% CI** | **p-value** | **HR** | **95% CI** | **p-value** | **HR** | **95% CI** | **p-value** |
| **Alzheimer's disease** | Q1 | — | — |  | — | — |  | — | — |  | — | — |  |
|  | Q2 | 3.30 | 2.22, 4.90 | <0.001 | 3.21 | 2.16, 4.77 | <0.001 | 3.38 | 2.27, 5.03 | <0.001 | 2.75 | 1.85, 4.11 | <0.001 |
|  | Q3 | 4.59 | 3.13, 6.73 | <0.001 | 4.40 | 3.00, 6.46 | <0.001 | 4.89 | 3.32, 7.20 | <0.001 | 3.57 | 2.41, 5.29 | <0.001 |
|  | Q4 | 5.98 | 4.11, 8.71 | <0.001 | 5.64 | 3.87, 8.23 | <0.001 | 6.79 | 4.62, 9.98 | <0.001 | 4.30 | 2.89, 6.41 | <0.001 |
| **Vascular dementia** | Q1 | — | — |  | — | — |  | — | — |  | — | — |  |
|  | Q2 | 4.43 | 2.06, 9.55 | <0.001 | 4.19 | 1.95, 9.04 | <0.001 | 4.12 | 1.91, 8.90 | <0.001 | 3.49 | 1.61, 7.57 | 0.002 |
|  | Q3 | 6.15 | 2.91, 13.0 | <0.001 | 5.66 | 2.68, 12.0 | <0.001 | 5.59 | 2.63, 11.9 | <0.001 | 4.27 | 1.98, 9.17 | <0.001 |
|  | Q4 | 9.23 | 4.44, 19.2 | <0.001 | 8.18 | 3.93, 17.0 | <0.001 | 8.18 | 3.89, 17.2 | <0.001 | 5.46 | 2.53, 11.8 | <0.001 |
| **CHD** | Q1 | — | — |  | — | — |  | — | — |  | — | — |  |
|  | Q2 | 2.21 | 2.00, 2.43 | <0.001 | 2.19 | 1.98, 2.41 | <0.001 | 2.08 | 1.88, 2.29 | <0.001 | 1.75 | 1.59, 1.93 | <0.001 |
|  | Q3 | 3.18 | 2.90, 3.49 | <0.001 | 3.13 | 2.85, 3.43 | <0.001 | 2.87 | 2.62, 3.15 | <0.001 | 2.19 | 1.99, 2.41 | <0.001 |
|  | Q4 | 4.49 | 4.11, 4.91 | <0.001 | 4.36 | 3.98, 4.76 | <0.001 | 3.82 | 3.48, 4.18 | <0.001 | 2.55 | 2.31, 2.81 | <0.001 |
| **Heart failure** | Q1 | — | — |  | — | — |  | — | — |  | — | — |  |
|  | Q2 | 2.36 | 1.91, 2.91 | <0.001 | 2.33 | 1.89, 2.87 | <0.001 | 2.15 | 1.74, 2.65 | <0.001 | 1.93 | 1.56, 2.39 | <0.001 |
|  | Q3 | 4.52 | 3.72, 5.48 | <0.001 | 4.41 | 3.64, 5.36 | <0.001 | 3.87 | 3.18, 4.70 | <0.001 | 3.21 | 2.63, 3.91 | <0.001 |
|  | Q4 | 7.41 | 6.15, 8.94 | <0.001 | 7.10 | 5.89, 8.56 | <0.001 | 5.85 | 4.84, 7.08 | <0.001 | 4.34 | 3.56, 5.29 | <0.001 |
| **Stroke** | Q1 | — | — |  | — | — |  | — | — |  | — | — |  |
|  | Q2 | 1.67 | 1.39, 2.00 | <0.001 | 1.65 | 1.38, 1.98 | <0.001 | 1.64 | 1.36, 1.96 | <0.001 | 1.44 | 1.20, 1.73 | <0.001 |
|  | Q3 | 2.39 | 2.02, 2.84 | <0.001 | 2.36 | 1.98, 2.80 | <0.001 | 2.33 | 1.96, 2.77 | <0.001 | 1.89 | 1.59, 2.26 | <0.001 |
|  | Q4 | 4.16 | 3.55, 4.89 | <0.001 | 4.06 | 3.45, 4.77 | <0.001 | 3.99 | 3.38, 4.71 | <0.001 | 2.97 | 2.49, 3.54 | <0.001 |
| Abbreviations: CI, Confidence Interval; HR, Hazard Ratio; CHD, coronary heart disease;  Model 1 was adjusted for none.  Model 2 was adjusted for ethnicity, TDI, and education.  Model 3 was adjusted for Model 2 plus vegetable serving, fruit serving, sedentary duration and BMI.  Model 4 was further adjusted for cholesterol medication, blood pressure medication, LDL-c, TG, SBP, and DBP. | | | | | | | | | | | | | |

**Table S6. Association of the ClivDnonlab with Alzheimer's disease, vascular dementia, coronary heart disease, heart failure and stroke.**

|  | | Model 1 | | | Model 2 | | | Model 3 | | | Model 4 | | |
| --- | --- | --- | --- | --- | --- | --- | --- | --- | --- | --- | --- | --- | --- |
| **Group** | **Characteristic** | **HR** | **95% CI** | **p-value** | **HR** | **95% CI** | **p-value** | **HR** | **95% CI** | **p-value** | **HR** | **95% CI** | **p-value** |
| **Alzheimer's disease** | Q1 | — | — |  | — | — |  | — | — |  | — | — |  |
|  | Q2 | 2.48 | 1.72, 3.59 | <0.001 | 2.42 | 1.67, 3.49 | <0.001 | 2.50 | 1.73, 3.62 | <0.001 | 2.08 | 1.43, 3.01 | <0.001 |
|  | Q3 | 3.51 | 2.47, 4.99 | <0.001 | 3.37 | 2.37, 4.79 | <0.001 | 3.64 | 2.55, 5.20 | <0.001 | 2.71 | 1.89, 3.89 | <0.001 |
|  | Q4 | 4.87 | 3.46, 6.86 | <0.001 | 4.59 | 3.26, 6.47 | <0.001 | 5.27 | 3.71, 7.47 | <0.001 | 3.42 | 2.38, 4.90 | <0.001 |
| **Vascular dementia** | Q1 | — | — |  | — | — |  | — | — |  | — | — |  |
|  | Q2 | 4.05 | 1.95, 8.40 | <0.001 | 3.85 | 1.85, 7.99 | <0.001 | 3.76 | 1.81, 7.83 | <0.001 | 3.19 | 1.53, 6.67 | 0.002 |
|  | Q3 | 5.57 | 2.73, 11.3 | <0.001 | 5.15 | 2.53, 10.5 | <0.001 | 5.03 | 2.46, 10.3 | <0.001 | 3.83 | 1.85, 7.90 | <0.001 |
|  | Q4 | 7.82 | 3.90, 15.7 | <0.001 | 6.98 | 3.48, 14.0 | <0.001 | 6.83 | 3.37, 13.8 | <0.001 | 4.51 | 2.19, 9.31 | <0.001 |
| **CHD** | Q1 | — | — |  | — | — |  | — | — |  | — | — |  |
|  | Q2 | 1.93 | 1.76, 2.11 | <0.001 | 1.91 | 1.75, 2.09 | <0.001 | 1.82 | 1.66, 2.00 | <0.001 | 1.56 | 1.42, 1.71 | <0.001 |
|  | Q3 | 2.52 | 2.31, 2.75 | <0.001 | 2.48 | 2.27, 2.71 | <0.001 | 2.28 | 2.08, 2.49 | <0.001 | 1.77 | 1.62, 1.94 | <0.001 |
|  | Q4 | 3.69 | 3.39, 4.01 | <0.001 | 3.59 | 3.30, 3.91 | <0.001 | 3.15 | 2.89, 3.44 | <0.001 | 2.17 | 1.99, 2.38 | <0.001 |
| **Heart failure** | Q1 | — | — |  | — | — |  | — | — |  | — | — |  |
|  | Q2 | 2.29 | 1.88, 2.79 | <0.001 | 2.26 | 1.86, 2.75 | <0.001 | 2.10 | 1.73, 2.56 | <0.001 | 1.88 | 1.54, 2.29 | <0.001 |
|  | Q3 | 3.61 | 3.00, 4.34 | <0.001 | 3.53 | 2.94, 4.25 | <0.001 | 3.11 | 2.58, 3.75 | <0.001 | 2.55 | 2.11, 3.09 | <0.001 |
|  | Q4 | 6.44 | 5.40, 7.68 | <0.001 | 6.21 | 5.20, 7.41 | <0.001 | 5.15 | 4.31, 6.16 | <0.001 | 3.74 | 3.11, 4.51 | <0.001 |
| **Stroke** | Q1 | — | — |  | — | — |  | — | — |  | — | — |  |
|  | Q2 | 1.64 | 1.38, 1.96 | <0.001 | 1.63 | 1.36, 1.94 | <0.001 | 1.60 | 1.35, 1.91 | <0.001 | 1.42 | 1.19, 1.70 | <0.001 |
|  | Q3 | 2.20 | 1.86, 2.60 | <0.001 | 2.17 | 1.83, 2.56 | <0.001 | 2.12 | 1.79, 2.51 | <0.001 | 1.74 | 1.46, 2.06 | <0.001 |
|  | Q4 | 3.72 | 3.18, 4.35 | <0.001 | 3.63 | 3.11, 4.25 | <0.001 | 3.52 | 2.99, 4.13 | <0.001 | 2.63 | 2.22, 3.11 | <0.001 |
| Abbreviations: CI, Confidence Interval; HR, Hazard Ratio; CHD, coronary heart disease;  Model 1 was adjusted for none.  Model 2 was adjusted for ethnicity, TDI, and education.  Model 3 was adjusted for Model 2 plus vegetable serving, fruit serving, sedentary duration and BMI.  Model 4 was further adjusted for cholesterol medication, blood pressure medication, LDL-c, TG, SBP, and DBP. | | | | | | | | | | | | | |

**Table S7. Association of the ClivDlab with dementia, cardiovascular disease, cancer and all-cause mortality (exclusion of participants with diseases and death events in the first 2 years of follow up).**

|  | | Model 1 | | | Model 2 | | | Model 3 | | | Model 4 | | |
| --- | --- | --- | --- | --- | --- | --- | --- | --- | --- | --- | --- | --- | --- |
|  | **Group** | **HR** | **95% CI** | **p-value** | **HR** | **95% CI** | **p-value** | **HR** | **95% CI** | **p-value** | **HR** | **95% CI** | **p-value** |
| **Dementia** | Q1 | — | — |  | — | — |  | — | — |  | — | — |  |
|  | Q2 | 2.95 | 2.24, 3.88 | <0.001 | 2.88 | 2.19, 3.79 | <0.001 | 2.98 | 2.26, 3.92 | <0.001 | 2.58 | 1.95, 3.40 | <0.001 |
|  | Q3 | 4.15 | 3.19, 5.40 | <0.001 | 4.02 | 3.08, 5.23 | <0.001 | 4.29 | 3.29, 5.61 | <0.001 | 3.41 | 2.60, 4.48 | <0.001 |
|  | Q4 | 5.70 | 4.41, 7.38 | <0.001 | 5.39 | 4.17, 6.98 | <0.001 | 6.10 | 4.68, 7.94 | <0.001 | 4.34 | 3.30, 5.72 | <0.001 |
| **CVD** | Q1 | — | — |  | — | — |  | — | — |  | — | — |  |
|  | Q2 | 2.08 | 1.90, 2.27 | <0.001 | 2.06 | 1.88, 2.25 | <0.001 | 1.96 | 1.80, 2.14 | <0.001 | 1.69 | 1.55, 1.85 | <0.001 |
|  | Q3 | 3.06 | 2.82, 3.33 | <0.001 | 3.01 | 2.77, 3.27 | <0.001 | 2.79 | 2.56, 3.03 | <0.001 | 2.20 | 2.02, 2.40 | <0.001 |
|  | Q4 | 4.51 | 4.16, 4.88 | <0.001 | 4.37 | 4.03, 4.73 | <0.001 | 3.89 | 3.58, 4.22 | <0.001 | 2.72 | 2.50, 2.97 | <0.001 |
| **Cancer** | Q1 | — | — |  | — | — |  | — | — |  | — | — |  |
|  | Q2 | 1.47 | 1.39, 1.55 | <0.001 | 1.46 | 1.38, 1.54 | <0.001 | 1.47 | 1.39, 1.55 | <0.001 | 1.41 | 1.33, 1.49 | <0.001 |
|  | Q3 | 1.79 | 1.70, 1.89 | <0.001 | 1.76 | 1.67, 1.86 | <0.001 | 1.80 | 1.71, 1.90 | <0.001 | 1.67 | 1.58, 1.77 | <0.001 |
|  | Q4 | 2.23 | 2.12, 2.35 | <0.001 | 2.21 | 2.10, 2.33 | <0.001 | 2.29 | 2.17, 2.41 | <0.001 | 2.04 | 1.93, 2.16 | <0.001 |
| **All-cause mortality** | Q1 | — | — |  | — | — |  | — | — |  | — | — |  |
|  | Q2 | 2.06 | 1.82, 2.33 | <0.001 | 2.03 | 1.79, 2.30 | <0.001 | 2.00 | 1.77, 2.27 | <0.001 | 1.86 | 1.64, 2.11 | <0.001 |
|  | Q3 | 2.93 | 2.60, 3.29 | <0.001 | 2.86 | 2.55, 3.22 | <0.001 | 2.80 | 2.48, 3.15 | <0.001 | 2.46 | 2.18, 2.78 | <0.001 |
|  | Q4 | 5.13 | 4.59, 5.73 | <0.001 | 4.91 | 4.39, 5.48 | <0.001 | 4.74 | 4.23, 5.31 | <0.001 | 3.87 | 3.43, 4.36 | <0.001 |
| Abbreviations: CI, Confidence Interval; HR, Hazard Ratio; CVD, cardiovascular disease;  Model 1 was adjusted for none.  Model 2 was adjusted for ethnicity, TDI, and education.  Model 3 was adjusted for Model 2 plus vegetable serving, fruit serving, sedentary duration and BMI.  Model 4 was further adjusted for cholesterol medication, blood pressure medication, LDL-c, TG, SBP, and DBP. | | | | | | | | | | | | | |

**Table S8. Association of the ClivDnonlab with dementia, cardiovascular disease, cancer and all-cause mortality (exclusion of participants with diseases and death events in the first 2 years of follow up).**

|  | | Model 1 | | | Model 2 | | | Model 3 | | | Model 4 | | |
| --- | --- | --- | --- | --- | --- | --- | --- | --- | --- | --- | --- | --- | --- |
|  | **Group** | **HR** | **95% CI** | **p-value** | **HR** | **95% CI** | **p-value** | **HR** | **95% CI** | **p-value** | **HR** | **95% CI** | **p-value** |
| **Dementia** | Q1 | — | — |  | — | — |  | — | — |  | — | — |  |
|  | Q2 | 2.43 | 1.87, 3.14 | <0.001 | 2.38 | 1.84, 3.08 | <0.001 | 2.42 | 1.87, 3.13 | <0.001 | 2.10 | 1.62, 2.73 | <0.001 |
|  | Q3 | 3.46 | 2.70, 4.42 | <0.001 | 3.34 | 2.61, 4.28 | <0.001 | 3.49 | 2.72, 4.48 | <0.001 | 2.78 | 2.16, 3.59 | <0.001 |
|  | Q4 | 4.68 | 3.68, 5.95 | <0.001 | 4.43 | 3.48, 5.64 | <0.001 | 4.81 | 3.76, 6.15 | <0.001 | 3.41 | 2.64, 4.39 | <0.001 |
| **CVD** | Q1 | — | — |  | — | — |  | — | — |  | — | — |  |
|  | Q2 | 1.93 | 1.77, 2.10 | <0.001 | 1.91 | 1.76, 2.08 | <0.001 | 1.83 | 1.68, 1.99 | <0.001 | 1.59 | 1.46, 1.73 | <0.001 |
|  | Q3 | 2.54 | 2.34, 2.75 | <0.001 | 2.50 | 2.31, 2.71 | <0.001 | 2.31 | 2.13, 2.51 | <0.001 | 1.85 | 1.70, 2.01 | <0.001 |
|  | Q4 | 3.86 | 3.58, 4.17 | <0.001 | 3.76 | 3.48, 4.06 | <0.001 | 3.34 | 3.09, 3.61 | <0.001 | 2.39 | 2.20, 2.59 | <0.001 |
| **Cancer** | Q1 | — | — |  | — | — |  | — | — |  | — | — |  |
|  | Q2 | 1.40 | 1.33, 1.48 | <0.001 | 1.38 | 1.31, 1.46 | <0.001 | 1.39 | 1.32, 1.47 | <0.001 | 1.32 | 1.25, 1.40 | <0.001 |
|  | Q3 | 1.68 | 1.60, 1.77 | <0.001 | 1.66 | 1.57, 1.74 | <0.001 | 1.67 | 1.59, 1.76 | <0.001 | 1.54 | 1.46, 1.63 | <0.001 |
|  | Q4 | 2.09 | 1.99, 2.20 | <0.001 | 2.06 | 1.96, 2.17 | <0.001 | 2.10 | 2.00, 2.21 | <0.001 | 1.85 | 1.75, 1.95 | <0.001 |
| **All-cause mortality** | Q1 | — | — |  | — | — |  | — | — |  | — | — |  |
|  | Q2 | 1.93 | 1.72, 2.18 | <0.001 | 1.91 | 1.70, 2.15 | <0.001 | 1.88 | 1.67, 2.11 | <0.001 | 1.73 | 1.54, 1.96 | <0.001 |
|  | Q3 | 2.63 | 2.35, 2.95 | <0.001 | 2.57 | 2.30, 2.88 | <0.001 | 2.49 | 2.22, 2.80 | <0.001 | 2.18 | 1.94, 2.45 | <0.001 |
|  | Q4 | 4.49 | 4.04, 5.00 | <0.001 | 4.31 | 3.87, 4.80 | <0.001 | 4.11 | 3.68, 4.58 | <0.001 | 3.29 | 2.94, 3.69 | <0.001 |
| Abbreviations: CI, Confidence Interval; HR, Hazard Ratio; CVD, cardiovascular disease;  Model 1 was adjusted for none.  Model 2 was adjusted for ethnicity, TDI, and education.  Model 3 was adjusted for Model 2 plus vegetable serving, fruit serving, sedentary duration and BMI.  Model 4 was further adjusted for cholesterol medication, blood pressure medication, LDL-c, TG, SBP, and DBP. | | | | | | | | | | | | | |

**Table S9. Association of the ClivDlab with Alzheimer's disease, vascular dementia, coronary heart disease, heart failure and stroke (exclusion of participants with diseases and death events in the first 2 years of follow up).**

|  | | Model 1 | | | Model 2 | | | Model 3 | | | Model 4 | | |
| --- | --- | --- | --- | --- | --- | --- | --- | --- | --- | --- | --- | --- | --- |
| **Group** | **Characteristic** | **HR** | **95% CI** | **p-value** | **HR** | **95% CI** | **p-value** | **HR** | **95% CI** | **p-value** | **HR** | **95% CI** | **p-value** |
| **Alzheimer's disease** | Q1 | — | — |  | — | — |  | — | — |  | — | — |  |
|  | Q2 | 3.23 | 2.16, 4.84 | <0.001 | 3.14 | 2.10, 4.71 | <0.001 | 3.31 | 2.21, 4.97 | <0.001 | 2.69 | 1.79, 4.04 | <0.001 |
|  | Q3 | 4.60 | 3.12, 6.79 | <0.001 | 4.42 | 2.99, 6.53 | <0.001 | 4.92 | 3.32, 7.29 | <0.001 | 3.55 | 2.38, 5.30 | <0.001 |
|  | Q4 | 5.95 | 4.06, 8.72 | <0.001 | 5.62 | 3.83, 8.25 | <0.001 | 6.77 | 4.57, 10.0 | <0.001 | 4.22 | 2.81, 6.34 | <0.001 |
| **Vascular dementia** | Q1 | — | — |  | — | — |  | — | — |  | — | — |  |
|  | Q2 | 4.21 | 1.94, 9.11 | <0.001 | 3.98 | 1.84, 8.61 | <0.001 | 3.89 | 1.79, 8.44 | <0.001 | 3.29 | 1.51, 7.17 | 0.003 |
|  | Q3 | 5.97 | 2.82, 12.7 | <0.001 | 5.50 | 2.59, 11.7 | <0.001 | 5.38 | 2.53, 11.5 | <0.001 | 4.08 | 1.89, 8.81 | <0.001 |
|  | Q4 | 8.60 | 4.12, 17.9 | <0.001 | 7.61 | 3.64, 15.9 | <0.001 | 7.53 | 3.56, 15.9 | <0.001 | 4.93 | 2.27, 10.7 | <0.001 |
| **CHD** | Q1 | — | — |  | — | — |  | — | — |  | — | — |  |
|  | Q2 | 2.24 | 2.02, 2.48 | <0.001 | 2.21 | 2.00, 2.45 | <0.001 | 2.10 | 1.89, 2.33 | <0.001 | 1.78 | 1.60, 1.97 | <0.001 |
|  | Q3 | 3.15 | 2.85, 3.48 | <0.001 | 3.10 | 2.81, 3.42 | <0.001 | 2.84 | 2.57, 3.14 | <0.001 | 2.18 | 1.97, 2.41 | <0.001 |
|  | Q4 | 4.46 | 4.06, 4.91 | <0.001 | 4.33 | 3.94, 4.77 | <0.001 | 3.79 | 3.44, 4.19 | <0.001 | 2.55 | 2.30, 2.83 | <0.001 |
| **Heart failure** | Q1 | — | — |  | — | — |  | — | — |  | — | — |  |
|  | Q2 | 2.34 | 1.88, 2.91 | <0.001 | 2.30 | 1.85, 2.87 | <0.001 | 2.12 | 1.70, 2.64 | <0.001 | 1.92 | 1.54, 2.39 | <0.001 |
|  | Q3 | 4.44 | 3.62, 5.44 | <0.001 | 4.34 | 3.54, 5.31 | <0.001 | 3.79 | 3.09, 4.65 | <0.001 | 3.15 | 2.56, 3.89 | <0.001 |
|  | Q4 | 7.43 | 6.11, 9.03 | <0.001 | 7.09 | 5.83, 8.63 | <0.001 | 5.82 | 4.77, 7.11 | <0.001 | 4.33 | 3.51, 5.33 | <0.001 |
| **Stroke** | Q1 | — | — |  | — | — |  | — | — |  | — | — |  |
|  | Q2 | 1.60 | 1.32, 1.93 | <0.001 | 1.58 | 1.30, 1.91 | <0.001 | 1.57 | 1.29, 1.90 | <0.001 | 1.37 | 1.12, 1.66 | 0.002 |
|  | Q3 | 2.36 | 1.98, 2.83 | <0.001 | 2.33 | 1.95, 2.79 | <0.001 | 2.30 | 1.92, 2.76 | <0.001 | 1.85 | 1.54, 2.23 | <0.001 |
|  | Q4 | 4.08 | 3.45, 4.83 | <0.001 | 3.98 | 3.36, 4.71 | <0.001 | 3.93 | 3.30, 4.68 | <0.001 | 2.88 | 2.40, 3.46 | <0.001 |
| Abbreviations: CI, Confidence Interval; HR, Hazard Ratio; CHD, coronary heart disease;  Model 1 was adjusted for none.  Model 2 was adjusted for ethnicity, TDI, and education.  Model 3 was adjusted for Model 2 plus vegetable serving, fruit serving, sedentary duration and BMI.  Model 4 was further adjusted for cholesterol medication, blood pressure medication, LDL-c, TG, SBP, and DBP. | | | | | | | | | | | | | |

**Table S10. Association of the ClivDnonlab with Alzheimer's disease, vascular dementia, coronary heart disease, heart failure and stroke (exclusion of participants with diseases and death events in the first 2 years of follow up).**

|  | | Model 1 | | | Model 2 | | | Model 3 | | | Model 4 | | |
| --- | --- | --- | --- | --- | --- | --- | --- | --- | --- | --- | --- | --- | --- |
| **Group** | **Characteristic** | **HR** | **95% CI** | **p-value** | **HR** | **95% CI** | **p-value** | **HR** | **95% CI** | **p-value** | **HR** | **95% CI** | **p-value** |
| **Alzheimer's disease** | Q1 | — | — |  | — | — |  | — | — |  | — | — |  |
|  | Q2 | 2.47 | 1.69, 3.60 | <0.001 | 2.40 | 1.65, 3.51 | <0.001 | 2.49 | 1.71, 3.64 | <0.001 | 2.06 | 1.41, 3.01 | <0.001 |
|  | Q3 | 3.58 | 2.49, 5.13 | <0.001 | 3.43 | 2.39, 4.93 | <0.001 | 3.72 | 2.58, 5.36 | <0.001 | 2.75 | 1.90, 3.99 | <0.001 |
|  | Q4 | 4.97 | 3.50, 7.05 | <0.001 | 4.68 | 3.30, 6.66 | <0.001 | 5.38 | 3.76, 7.71 | <0.001 | 3.45 | 2.39, 5.00 | <0.001 |
| **Vascular dementia** | Q1 | — | — |  | — | — |  | — | — |  | — | — |  |
|  | Q2 | 3.85 | 1.85, 8.02 | <0.001 | 3.65 | 1.75, 7.61 | <0.001 | 3.56 | 1.70, 7.43 | <0.001 | 3.02 | 1.44, 6.32 | 0.003 |
|  | Q3 | 5.29 | 2.59, 10.8 | <0.001 | 4.88 | 2.39, 9.97 | <0.001 | 4.73 | 2.31, 9.71 | <0.001 | 3.59 | 1.73, 7.45 | <0.001 |
|  | Q4 | 7.36 | 3.66, 14.8 | <0.001 | 6.54 | 3.25, 13.2 | <0.001 | 6.34 | 3.12, 12.9 | <0.001 | 4.14 | 1.99, 8.58 | <0.001 |
| **CHD** | Q1 | — | — |  | — | — |  | — | — |  | — | — |  |
|  | Q2 | 1.97 | 1.78, 2.17 | <0.001 | 1.95 | 1.77, 2.15 | <0.001 | 1.86 | 1.69, 2.05 | <0.001 | 1.60 | 1.45, 1.76 | <0.001 |
|  | Q3 | 2.51 | 2.28, 2.75 | <0.001 | 2.47 | 2.25, 2.72 | <0.001 | 2.27 | 2.06, 2.49 | <0.001 | 1.77 | 1.61, 1.96 | <0.001 |
|  | Q4 | 3.71 | 3.39, 4.06 | <0.001 | 3.62 | 3.31, 3.96 | <0.001 | 3.18 | 2.90, 3.48 | <0.001 | 2.20 | 2.00, 2.42 | <0.001 |
| **Heart failure** | Q1 | — | — |  | — | — |  | — | — |  | — | — |  |
|  | Q2 | 2.31 | 1.87, 2.84 | <0.001 | 2.28 | 1.85, 2.81 | <0.001 | 2.11 | 1.71, 2.60 | <0.001 | 1.90 | 1.54, 2.34 | <0.001 |
|  | Q3 | 3.67 | 3.01, 4.46 | <0.001 | 3.59 | 2.95, 4.37 | <0.001 | 3.15 | 2.59, 3.84 | <0.001 | 2.60 | 2.13, 3.18 | <0.001 |
|  | Q4 | 6.63 | 5.50, 7.99 | <0.001 | 6.37 | 5.28, 7.68 | <0.001 | 5.27 | 4.36, 6.37 | <0.001 | 3.84 | 3.15, 4.67 | <0.001 |
| **Stroke** | Q1 | — | — |  | — | — |  | — | — |  | — | — |  |
|  | Q2 | 1.62 | 1.35, 1.95 | <0.001 | 1.61 | 1.34, 1.94 | <0.001 | 1.59 | 1.32, 1.91 | <0.001 | 1.40 | 1.16, 1.69 | <0.001 |
|  | Q3 | 2.21 | 1.86, 2.64 | <0.001 | 2.19 | 1.83, 2.61 | <0.001 | 2.14 | 1.79, 2.55 | <0.001 | 1.74 | 1.45, 2.08 | <0.001 |
|  | Q4 | 3.67 | 3.11, 4.32 | <0.001 | 3.58 | 3.04, 4.23 | <0.001 | 3.48 | 2.93, 4.12 | <0.001 | 2.57 | 2.15, 3.06 | <0.001 |
| Abbreviations: CI, Confidence Interval; HR, Hazard Ratio; CHD, coronary heart disease;  Model 1 was adjusted for none.  Model 2 was adjusted for ethnicity, TDI, and education.  Model 3 was adjusted for Model 2 plus vegetable serving, fruit serving, sedentary duration and BMI.  Model 4 was further adjusted for cholesterol medication, blood pressure medication, LDL-c, TG, SBP, and DBP. | | | | | | | | | | | | | |

**Table S11. Association of the ClivDlab with dementia, cardiovascular disease, and cancer (Treating death as a competing risk).**

| **Group** | **Characteristic** | **HR** | **95% CI** | **p-value** |
| --- | --- | --- | --- | --- |
| **Dementia** | Q1 | — | — |  |
|  | Q2 | 2.56 | 1.96, 3.34 | <0.001 |
|  | Q3 | 3.34 | 2.57, 4.34 | <0.001 |
|  | Q4 | 4.30 | 3.30, 5.61 | <0.001 |
| **CVD** | Q1 | — | — |  |
|  | Q2 | 1.69 | 1.55, 1.84 | <0.001 |
|  | Q3 | 2.20 | 2.03, 2.39 | <0.001 |
|  | Q4 | 2.72 | 2.51, 2.95 | <0.001 |
| **Cancer** | Q1 | — | — |  |
|  | Q2 | 1.42 | 1.34, 1.49 | <0.001 |
|  | Q3 | 1.68 | 1.59, 1.77 | <0.001 |
|  | Q4 | 2.05 | 1.94, 2.16 | <0.001 |
| Abbreviations: CI, Confidence Interval; HR, Hazard Ratio; CVD, cardiovascular disease;  All was adjusted for ethnicity, TDI, education, vegetable serving, fruit serving, sedentary duration and BMI, cholesterol medication, blood pressure medication, LDL-c, TG, SBP, and DBP. | | | | |

**Table S12. Association of the ClivDnonlab with dementia, cardiovascular disease, and cancer (Treating death as a competing risk).**

| **Group** | **Characteristic** | **HR** | **95% CI** | **p-value** |
| --- | --- | --- | --- | --- |
| **Dementia** | Q1 | — | — |  |
|  | Q2 | 2.10 | 1.64, 2.70 | <0.001 |
|  | Q3 | 2.74 | 2.15, 3.50 | <0.001 |
|  | Q4 | 3.31 | 2.59, 4.23 | <0.001 |
| **CVD** | Q1 | — | — |  |
|  | Q2 | 1.56 | 1.44, 1.69 | <0.001 |
|  | Q3 | 1.83 | 1.69, 1.98 | <0.001 |
|  | Q4 | 2.36 | 2.18, 2.54 | <0.001 |
| **Cancer** | Q1 | — | — |  |
|  | Q2 | 1.32 | 1.26, 1.39 | <0.001 |
|  | Q3 | 1.55 | 1.48, 1.63 | <0.001 |
|  | Q4 | 1.85 | 1.76, 1.95 | <0.001 |
| Abbreviations: CI, Confidence Interval; HR, Hazard Ratio; CVD, cardiovascular disease;  All was adjusted for ethnicity, TDI, education, vegetable serving, fruit serving, sedentary duration and BMI, cholesterol medication, blood pressure medication, LDL-c, TG, SBP, and DBP. | | | | |

**Table S13. Association of the ClivDlab with Alzheimer's disease, vascular dementia, coronary heart disease, heart failure and stroke (Treating death as a competing risk).**

|  |  | **HR** | **95% CI** | **p-value** |
| --- | --- | --- | --- | --- |
| **Alzheimer's disease** | Q1 | — | — |  |
|  | Q2 | 2.75 | 1.85, 4.11 | <0.001 |
|  | Q3 | 3.57 | 2.41, 5.29 | <0.001 |
|  | Q4 | 4.30 | 2.89, 6.41 | <0.001 |
| **Vascular dementia** | Q1 | — | — |  |
|  | Q2 | 3.49 | 1.61, 7.57 | 0.002 |
|  | Q3 | 4.27 | 1.98, 9.17 | <0.001 |
|  | Q4 | 5.46 | 2.53, 11.8 | <0.001 |
| **CHD** | Q1 | — | — |  |
|  | Q2 | 1.75 | 1.59, 1.93 | <0.001 |
|  | Q3 | 2.19 | 1.99, 2.41 | <0.001 |
|  | Q4 | 2.55 | 2.31, 2.81 | <0.001 |
| **Heart failure** | Q1 | — | — |  |
|  | Q2 | 1.93 | 1.56, 2.39 | <0.001 |
|  | Q3 | 3.21 | 2.63, 3.91 | <0.001 |
|  | Q4 | 4.34 | 3.56, 5.29 | <0.001 |
| **Stroke** | Q1 | — | — |  |
|  | Q2 | 1.44 | 1.20, 1.73 | <0.001 |
|  | Q3 | 1.89 | 1.59, 2.26 | <0.001 |
|  | Q4 | 2.97 | 2.49, 3.54 | <0.001 |
| Abbreviations: CI, Confidence Interval; HR, Hazard Ratio; CHD, coronary heart disease;  All was adjusted for ethnicity, TDI, education, vegetable serving, fruit serving, sedentary duration and BMI, cholesterol medication, blood pressure medication, LDL-c, TG, SBP, and DBP. | | | | |

**Table S14. Association of the ClivDnonlab with Alzheimer's disease, vascular dementia, coronary heart disease, heart failure and stroke (Treating death as a competing risk).**

|  |  | **HR (95% CI)** | **95% CI** | **p-value** |
| --- | --- | --- | --- | --- |
| **Alzheimer's disease** | Q1 | — | — |  |
|  | Q2 | 2.08 | 1.43, 3.01 | <0.001 |
|  | Q3 | 2.71 | 1.89, 3.89 | <0.001 |
|  | Q4 | 3.42 | 2.38, 4.90 | <0.001 |
| **Vascular dementia** | Q1 | — | — |  |
|  | Q2 | 3.19 | 1.53, 6.67 | 0.002 |
|  | Q3 | 3.83 | 1.85, 7.90 | <0.001 |
|  | Q4 | 4.51 | 2.19, 9.31 | <0.001 |
| **CHD** | Q1 | — | — |  |
|  | Q2 | 1.56 | 1.42, 1.71 | <0.001 |
|  | Q3 | 1.77 | 1.62, 1.94 | <0.001 |
|  | Q4 | 2.17 | 1.99, 2.38 | <0.001 |
| **Heart failure** | Q1 | — | — |  |
|  | Q2 | 1.88 | 1.54, 2.29 | <0.001 |
|  | Q3 | 2.55 | 2.11, 3.09 | <0.001 |
|  | Q4 | 3.74 | 3.11, 4.51 | <0.001 |
| **Stroke** | Q1 | — | — |  |
|  | Q2 | 1.42 | 1.19, 1.70 | <0.001 |
|  | Q3 | 1.74 | 1.46, 2.06 | <0.001 |
|  | Q4 | 2.63 | 2.22, 3.11 | <0.001 |
| Abbreviations: CI, Confidence Interval; HR, Hazard Ratio; CHD, coronary heart disease;  All was adjusted for ethnicity, TDI, education, vegetable serving, fruit serving, sedentary duration and BMI, cholesterol medication, blood pressure medication, LDL-c, TG, SBP, and DBP. | | | | |

**Figure S1. Kaplan-Meier survival curves of ClivDnonlab for (A) dementia, (B) cardiovascular diseases, (C) cancer, and (D) all-cause mortality.**

**
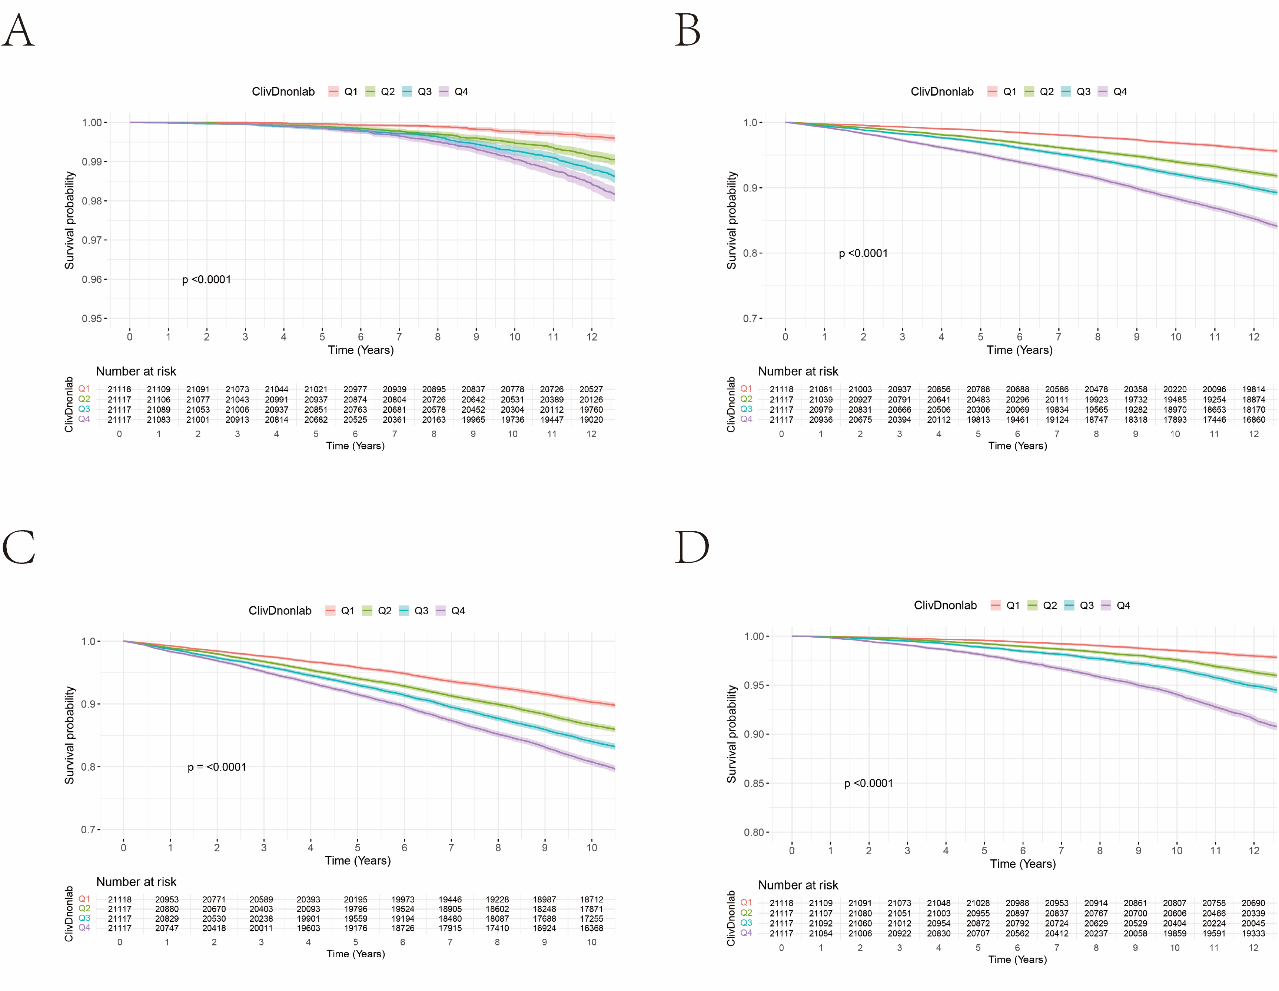
**

**Figure S2. Kaplan-Meier survival curves of ClivDlab for (A) coronary heart disease, (B) heart failure, (C) stroke, (D) vascular dementia, and (E) Alzheimer's disease.**

**
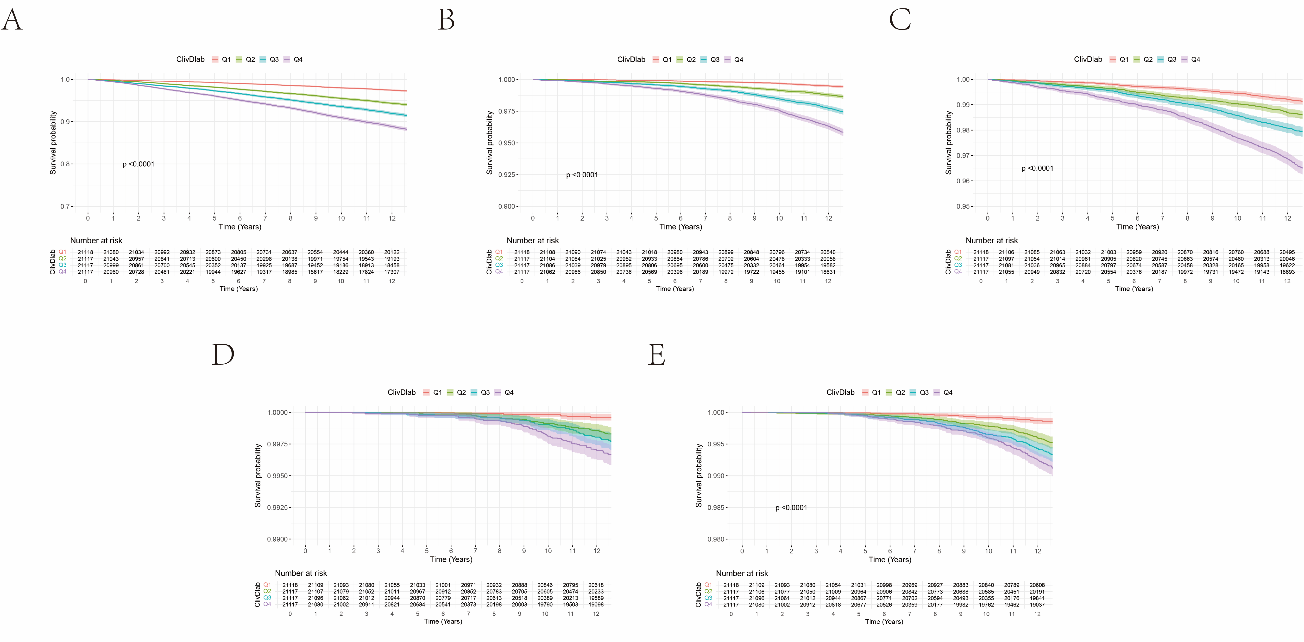
**

**Figure S3. Kaplan-Meier survival curves of ClivDnonlab for (A) coronary heart disease, (B) heart failure, (C) stroke, (D) vascular dementia, and (E) Alzheimer's disease.**

**
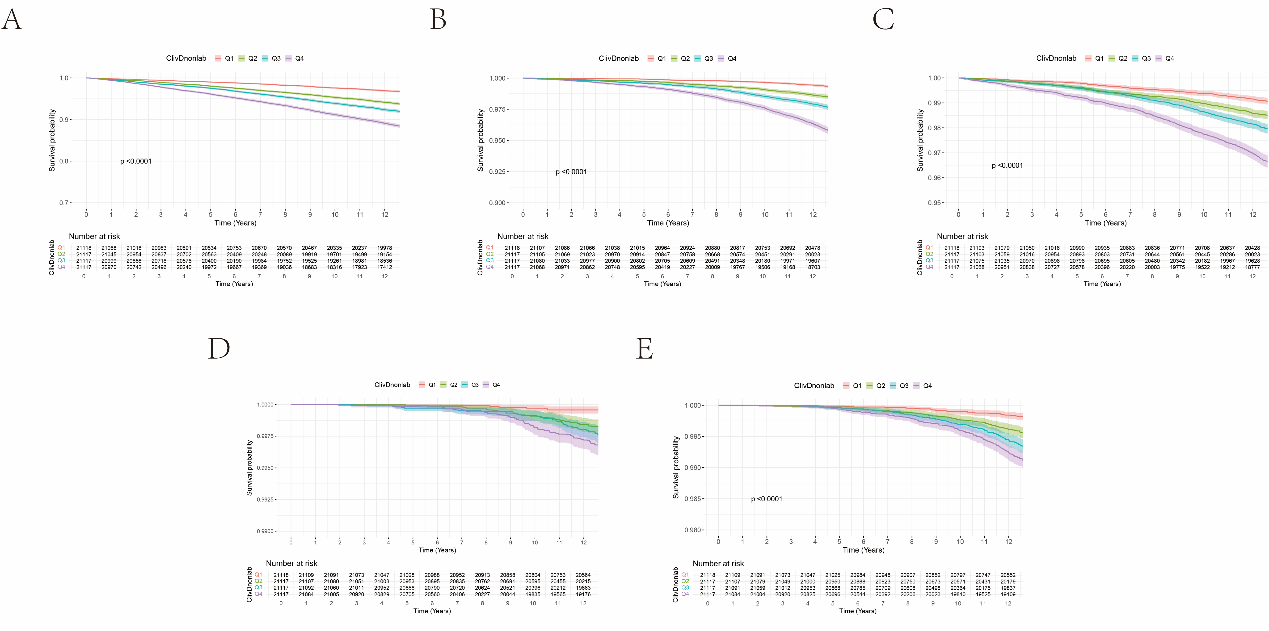
**

**Figure S4. Restricted cubic spline curve for the association of ClivDnonlab with (A) dementia, (B) cardiovascular diseases, (C) cancer, and (D) all-cause mortality.**

**
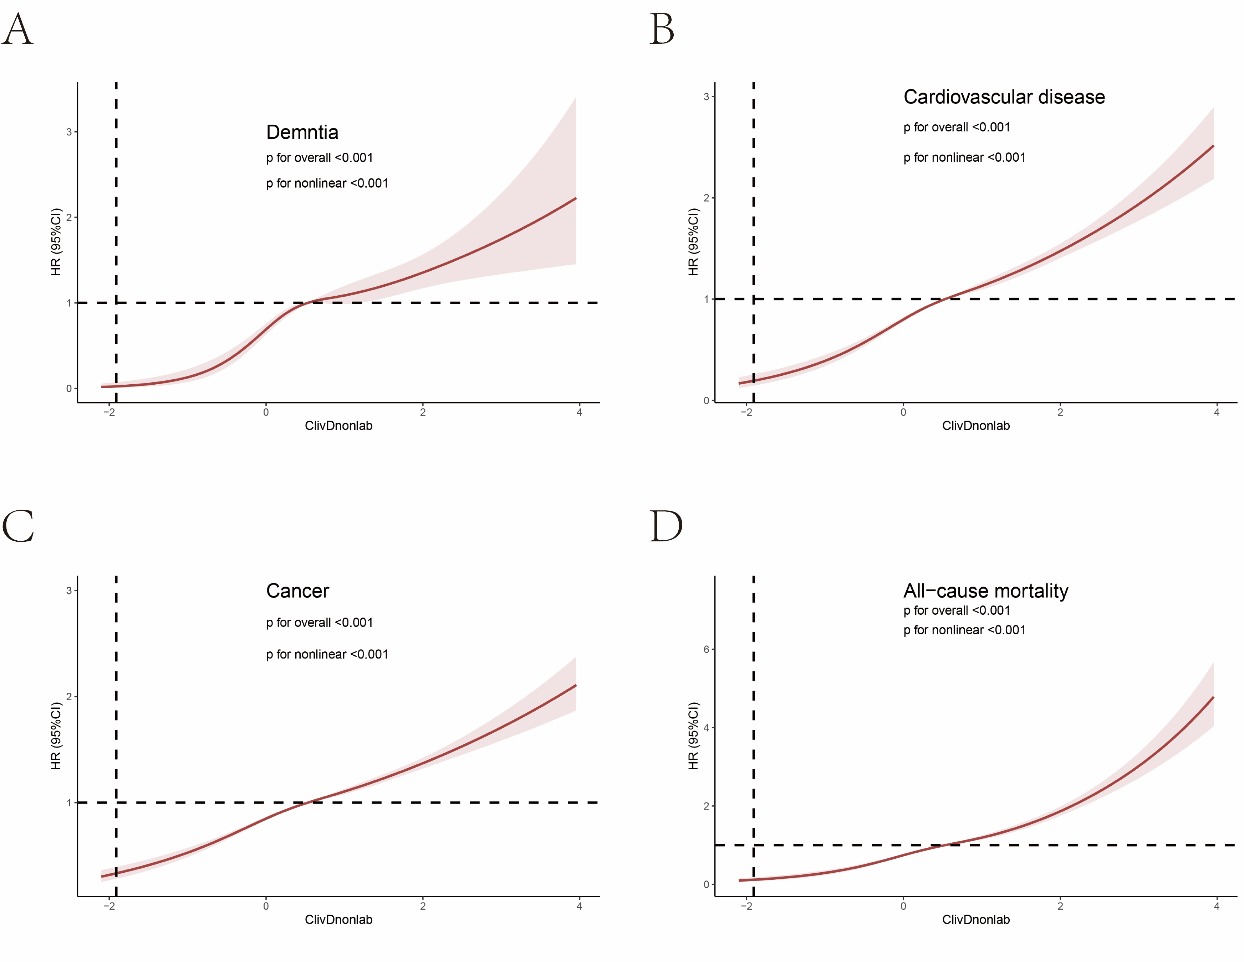
**

Abbreviations: HR = Hazard Ratio；CI = confidence interval

**Figure S5. Restricted cubic spline curve for the association of ClivDlab with (A) coronary heart disease, (B) heart failure, (C) stroke, (D) vascular dementia, and (E) Alzheimer's disease.**

**
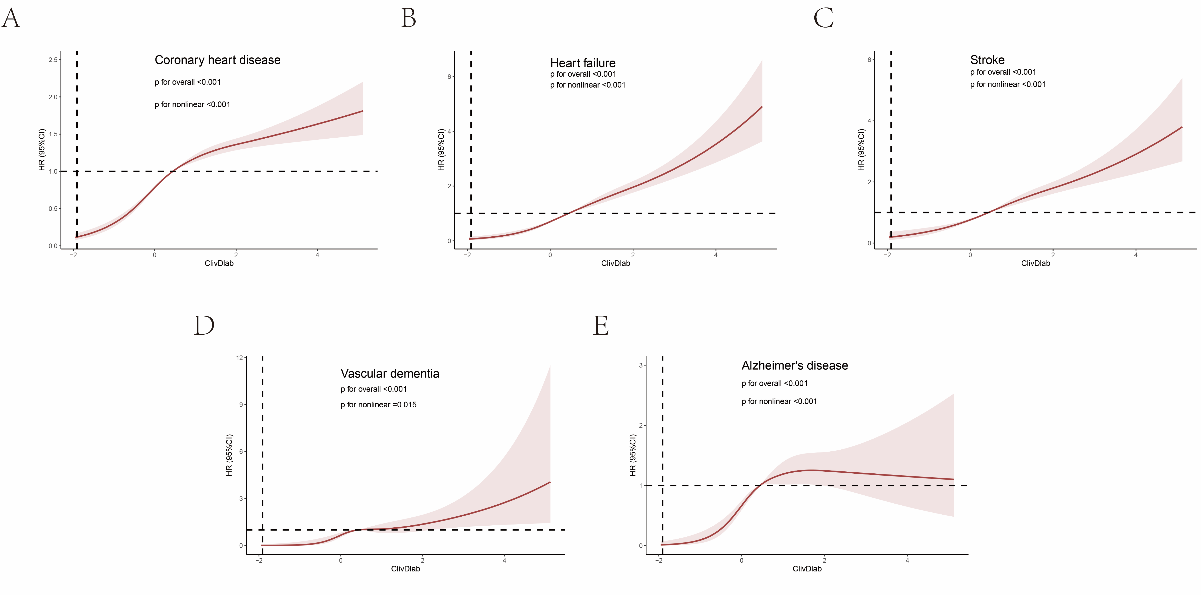
**

Abbreviations: HR = Hazard Ratio；CI = confidence interval

**Figure S6. Restricted cubic spline curve for the association of ClivDnonlab with (A) coronary heart disease, (B) heart failure, (C) stroke, (D) vascular dementia, and (E) Alzheimer's disease.**

**
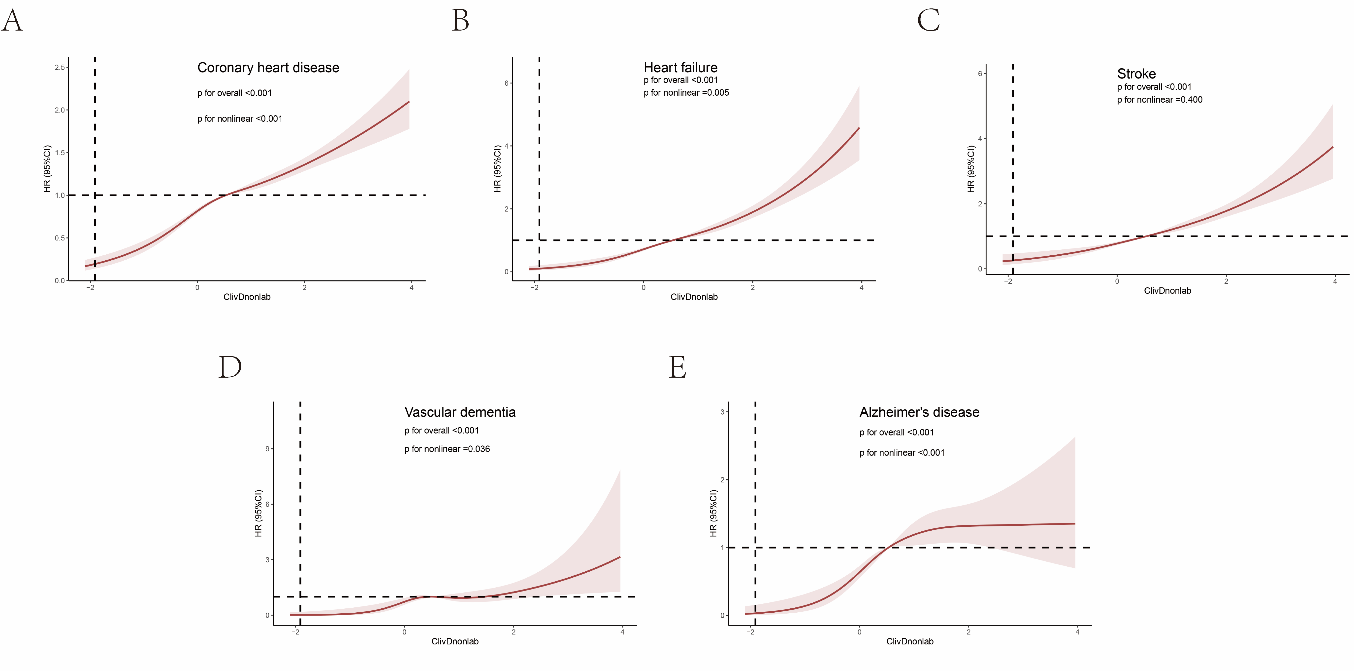
**

Abbreviations: HR = Hazard Ratio；CI = confidence interval

**Figure S7.** **Forest plot of all-cause mortality according to subgroups (ClivDlab)**


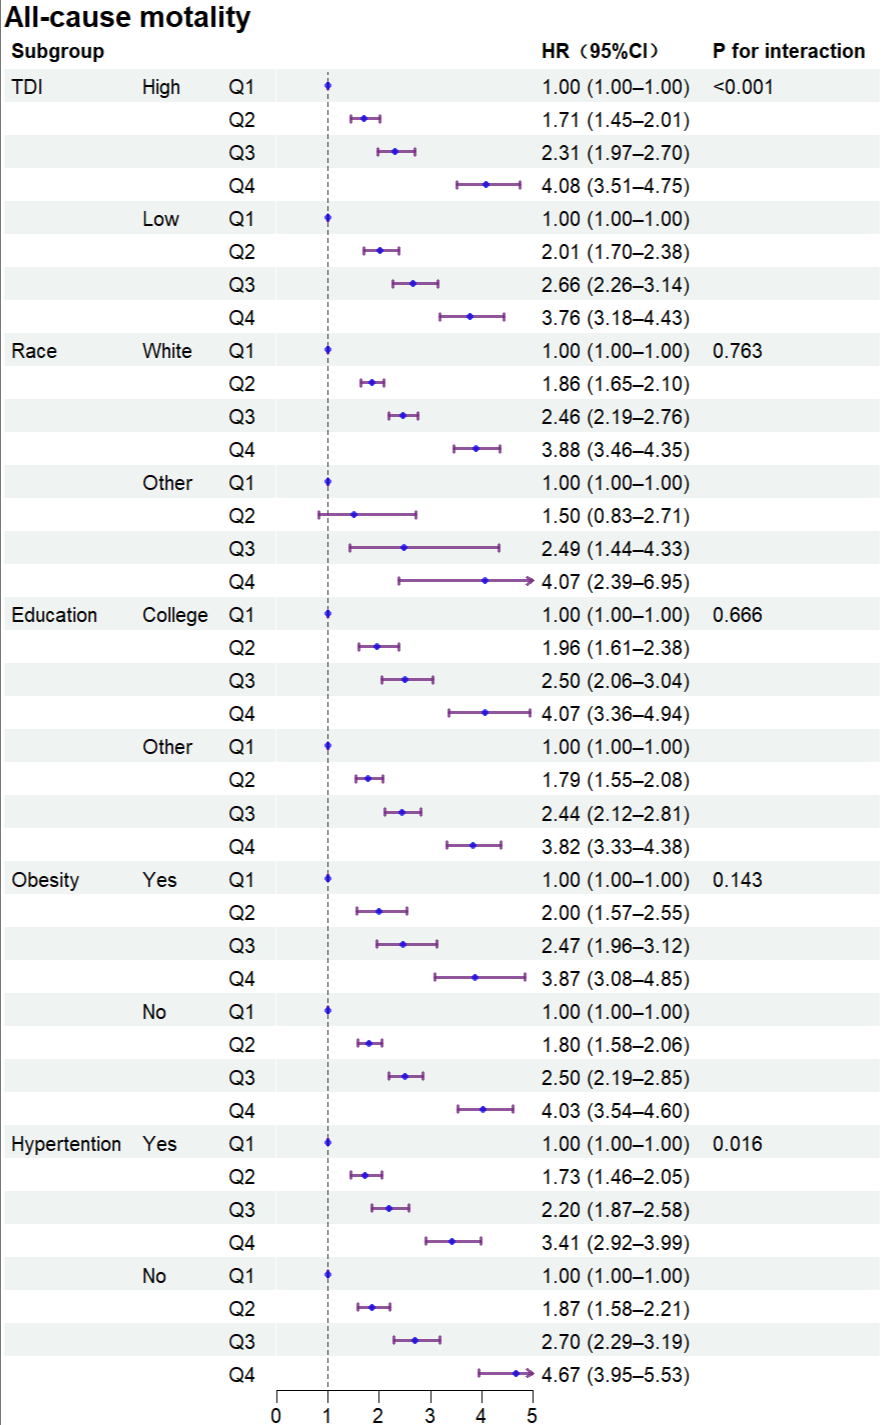


Abbreviations: HR = Hazard Ratio; CI = confidence interval; TDI= Townsend deprivation index

**Figure S8. Forest plot of all-cause mortality according to subgroups (ClivDnonlab)**


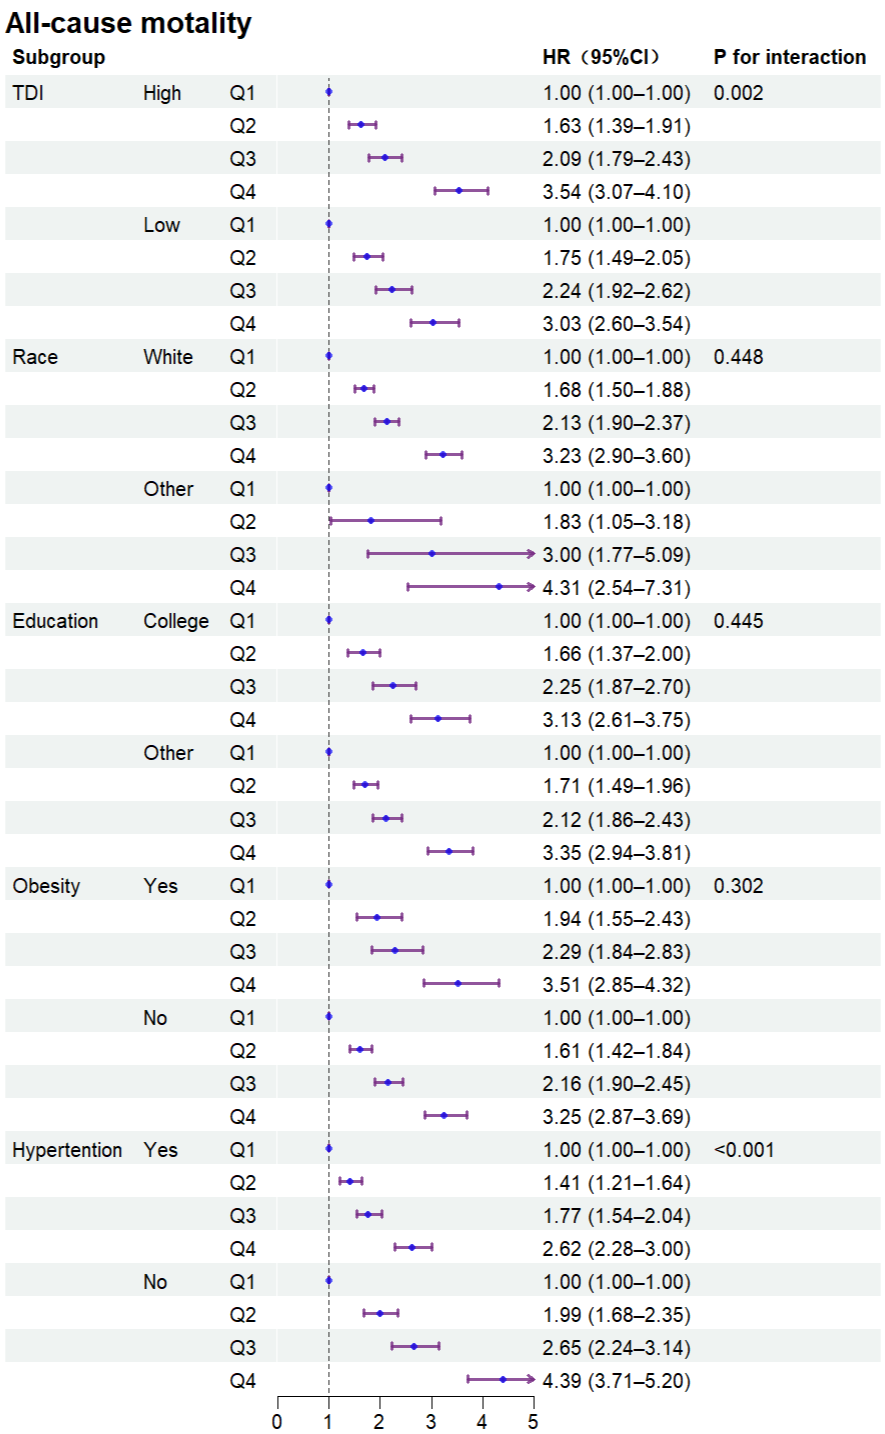


Abbreviations: HR = Hazard Ratio; CI = confidence interval; TDI= Townsend deprivation index

**Figure S9. Forest plot of all-cause dementia according to subgroups (ClivDlab).**


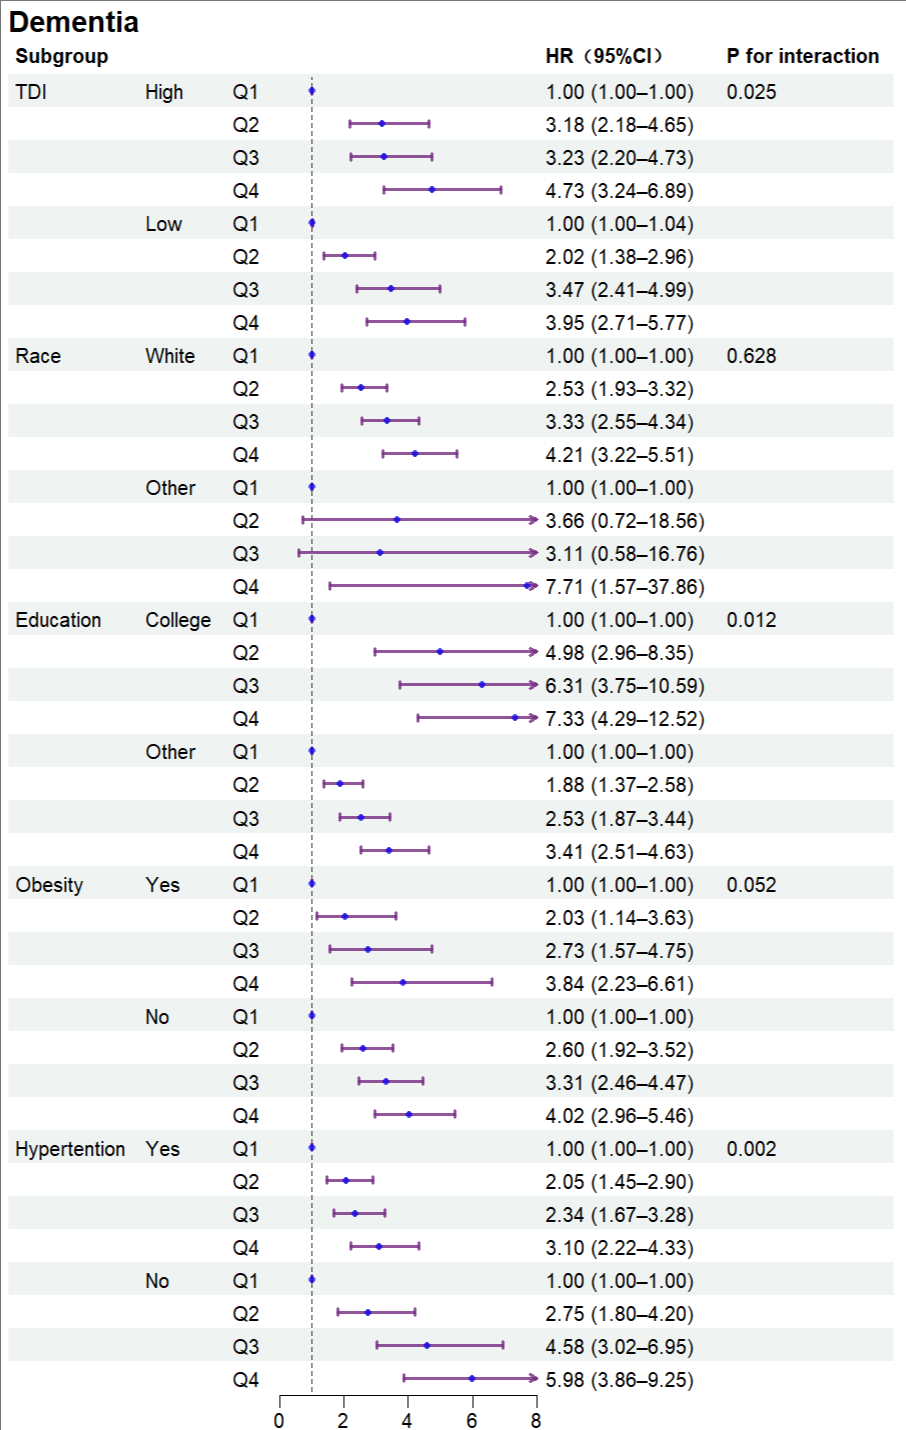


Abbreviations: HR = Hazard Ratio; CI = confidence interval; TDI= Townsend deprivation index

**Figure S10. Forest plot of all-cause dementia according to subgroups (ClivDnonlab).**


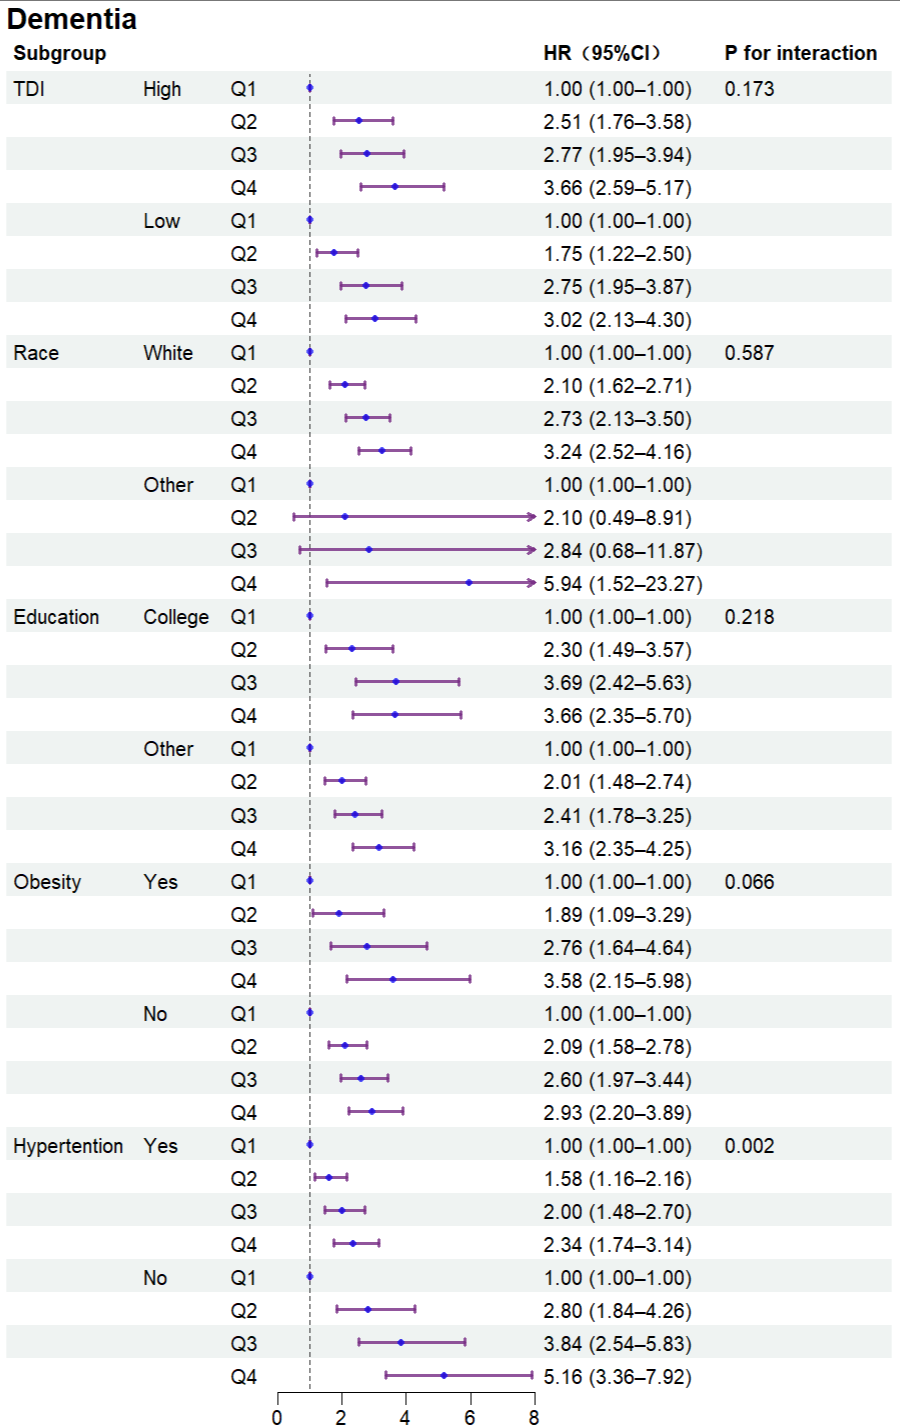


Abbreviations: HR = Hazard Ratio; CI = confidence interval; TDI= Townsend deprivation index

**Figure S11. Forest plot of total cardiovascular diseases according to subgroups (ClivDlab).**


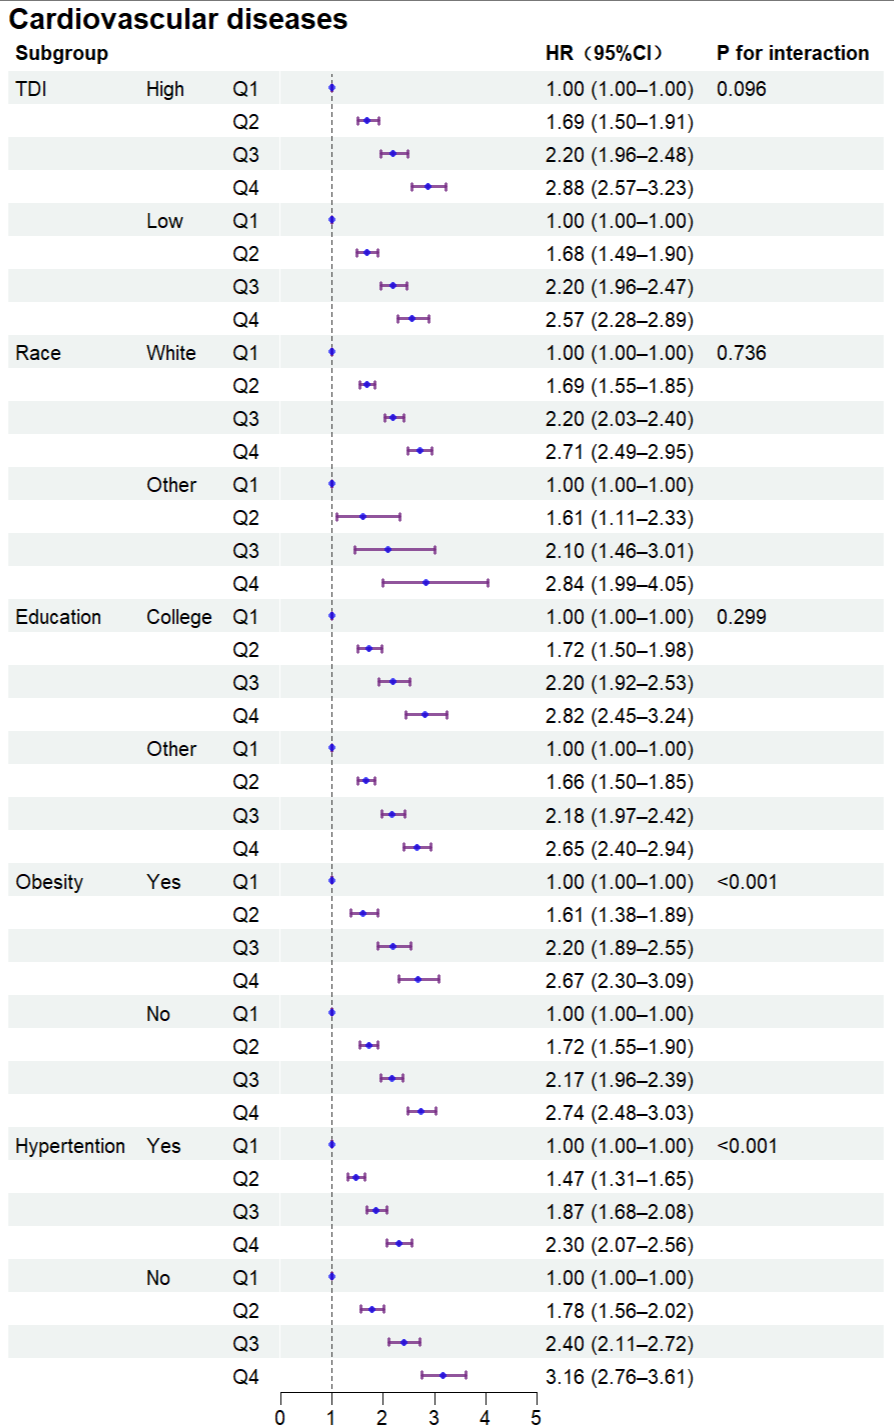


Abbreviations: HR = Hazard Ratio; CI = confidence interval; TDI= Townsend deprivation index

**Figure S12. Forest plot of total cardiovascular diseases according to subgroups (ClivDnonlab).**


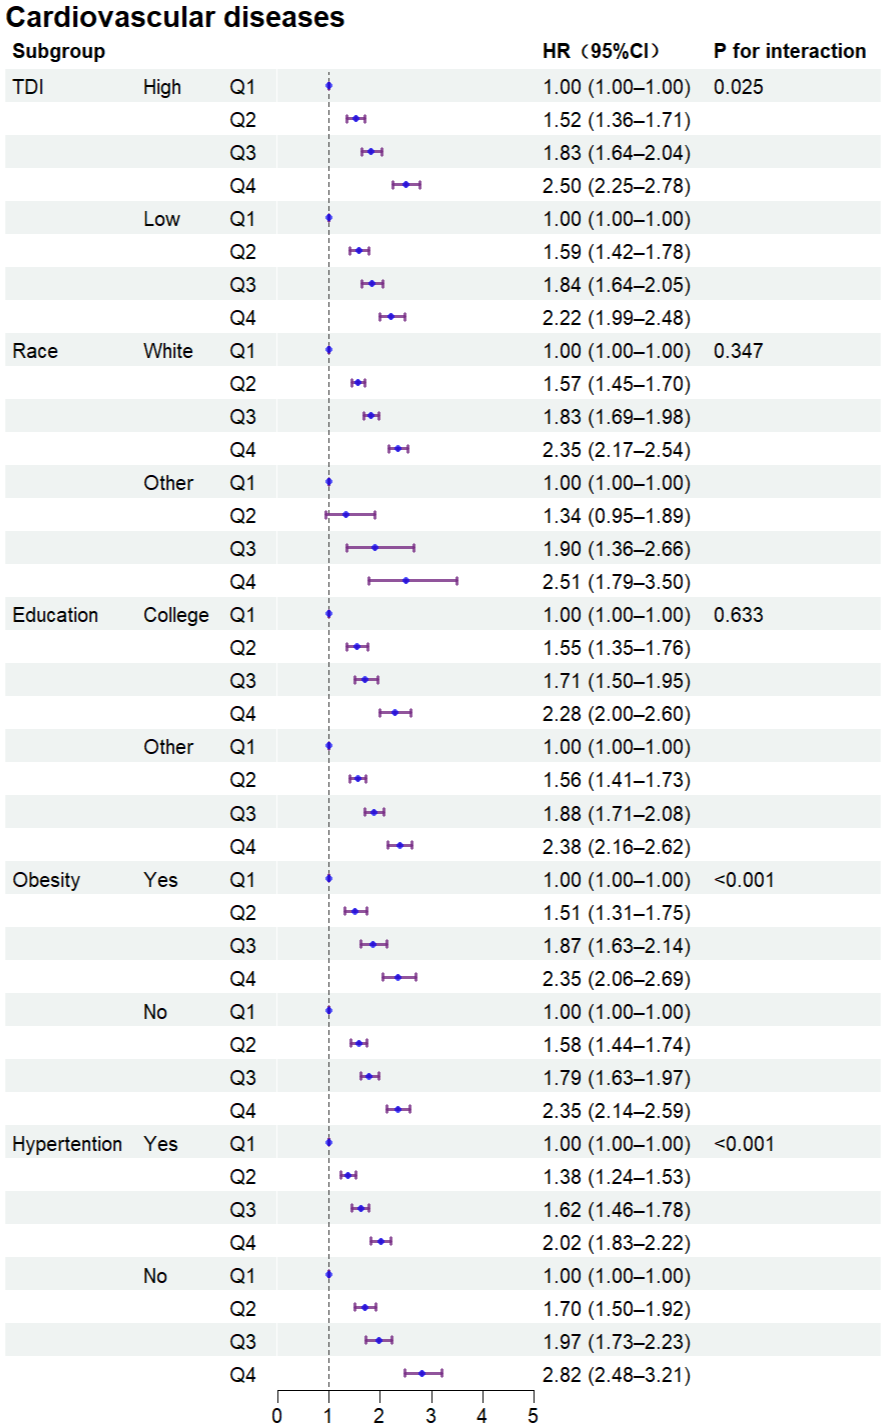


Abbreviations: HR = Hazard Ratio; CI = confidence interval; TDI= Townsend deprivation index

**Figure S13. Forest plot of cancer according to subgroups (ClivDlab).**


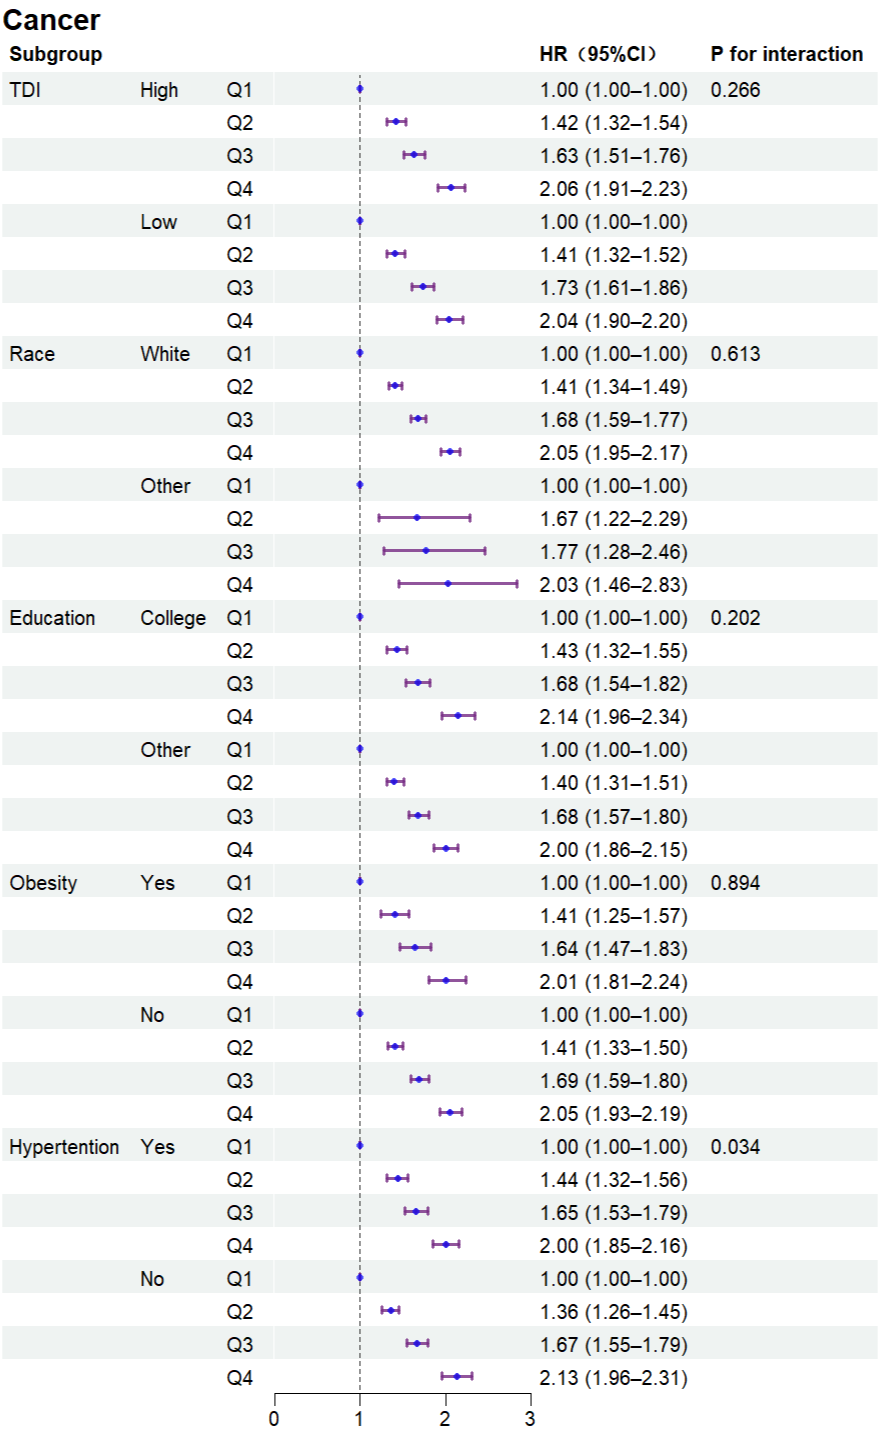


Abbreviations: HR = Hazard Ratio; CI = confidence interval; TDI= Townsend deprivation index

**Figure S14. Forest plot of cancer according to subgroups (ClivDnonlab).**


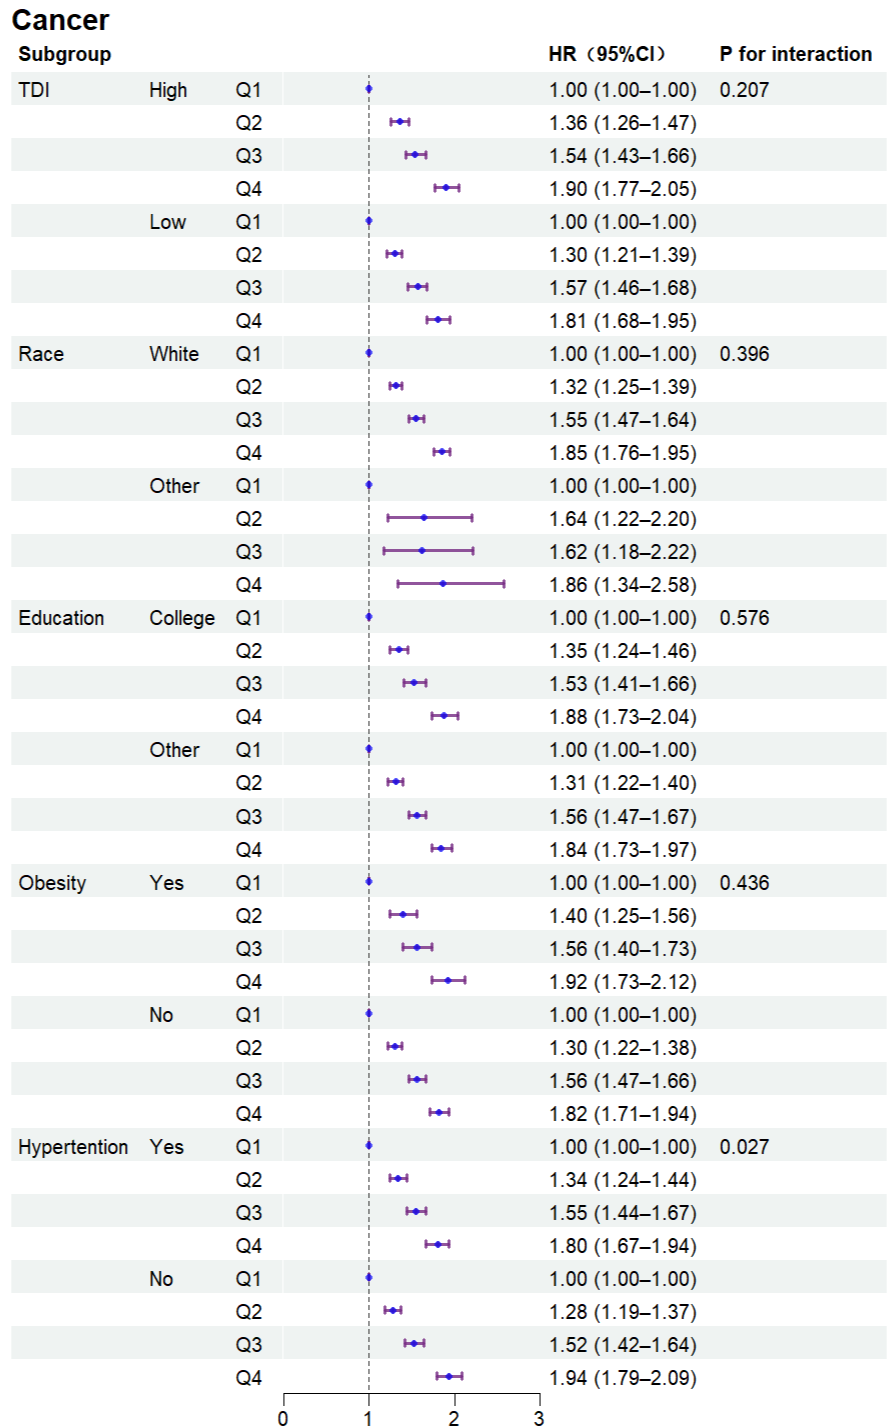


Abbreviations: HR = Hazard Ratio; CI = confidence interval; TDI= Townsend deprivation index

**Figure S15. Forest plot of Alzheimer's disease according to subgroups (ClivDlab).**


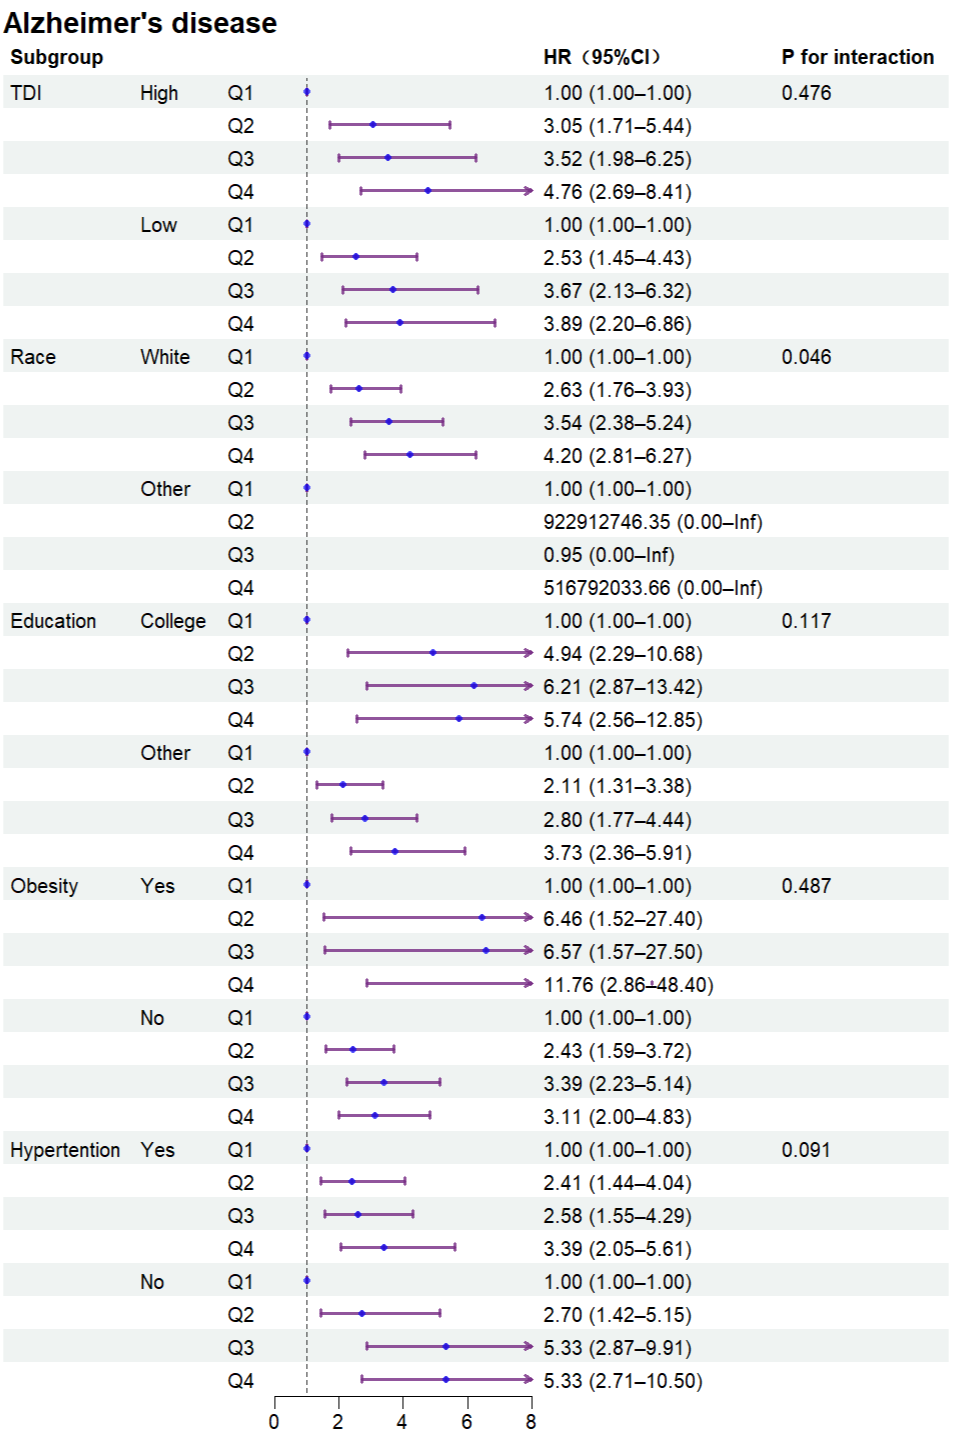


Abbreviations: HR = Hazard Ratio; CI = confidence interval; TDI= Townsend deprivation index

**Figure S16. Forest plot of Alzheimer's disease according to subgroups (ClivDnonlab).**


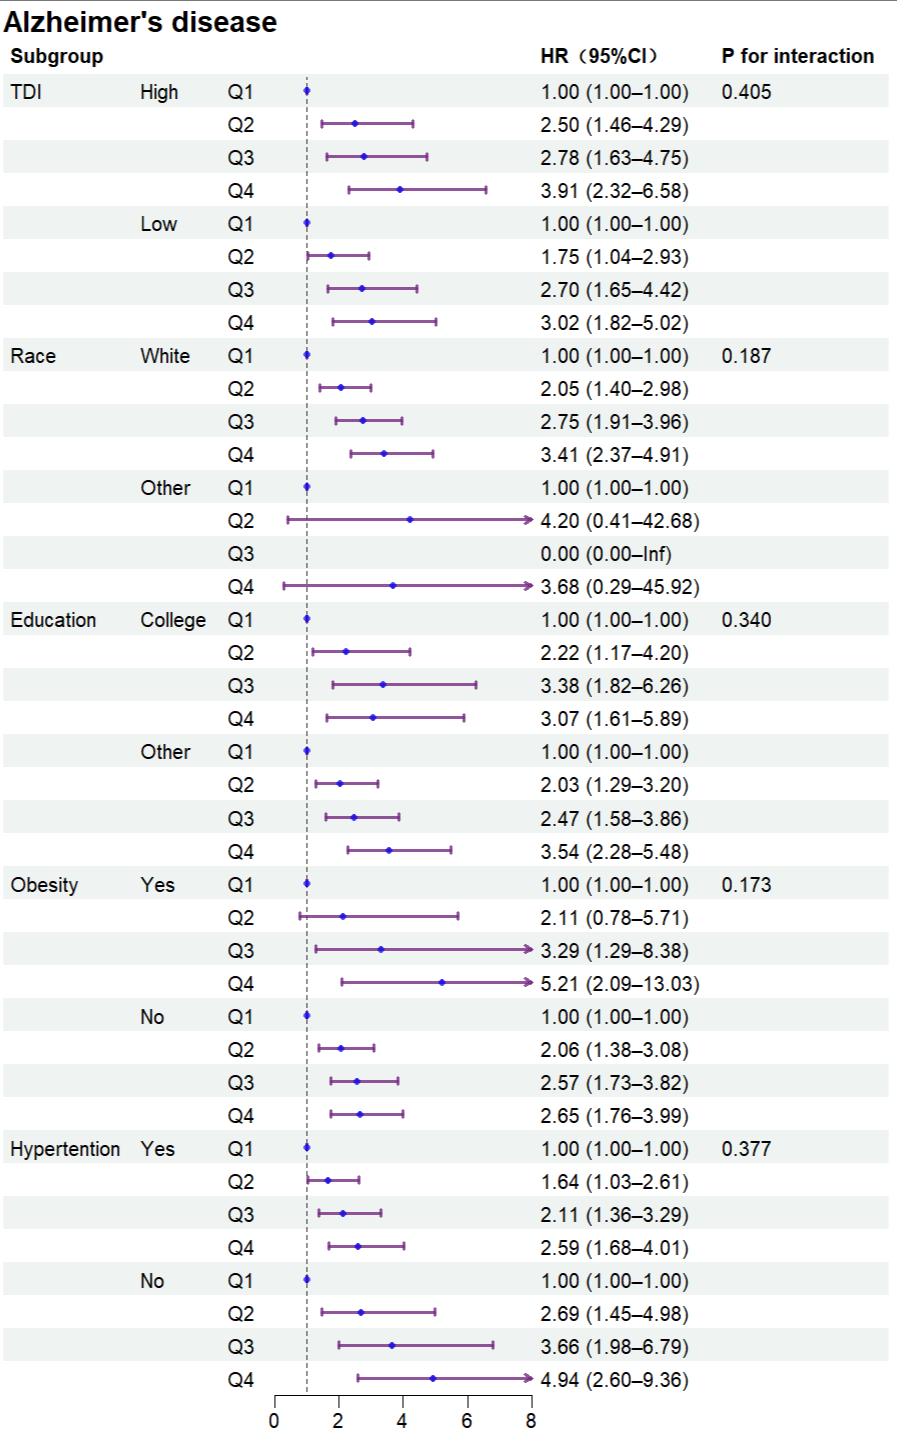


Abbreviations: HR = Hazard Ratio; CI = confidence interval; TDI= Townsend deprivation index

**Figure S17. Forest plot of vascular dementia according to subgroups (ClivDlab).**


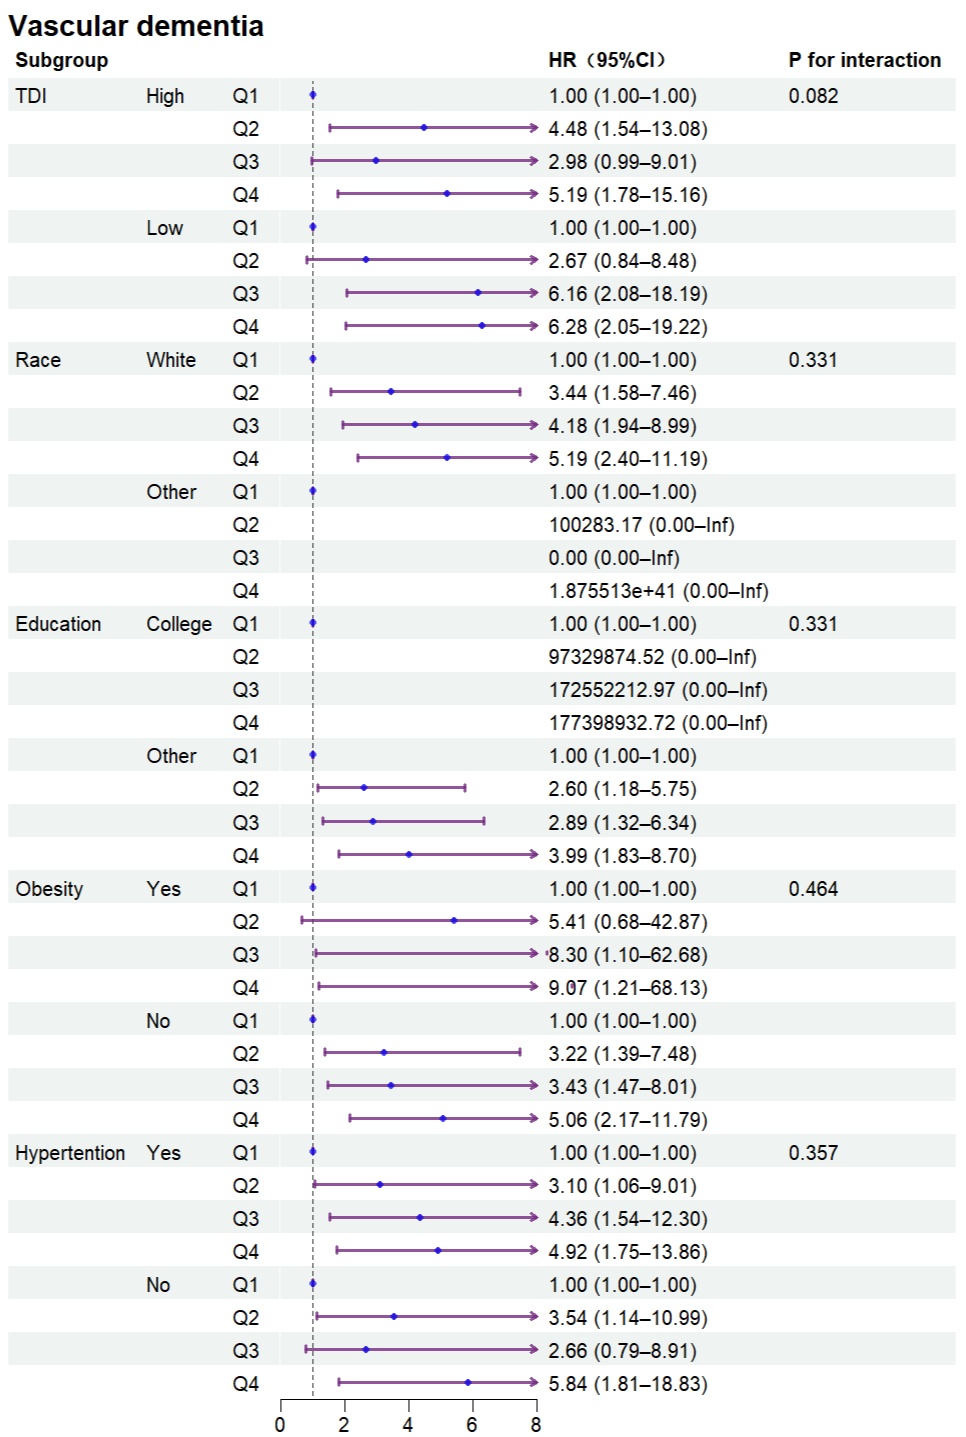


Abbreviations: HR = Hazard Ratio; CI = confidence interval; TDI= Townsend deprivation index

**Figure S18. Forest plot of vascular dementia according to subgroups (ClivDnonlab).**


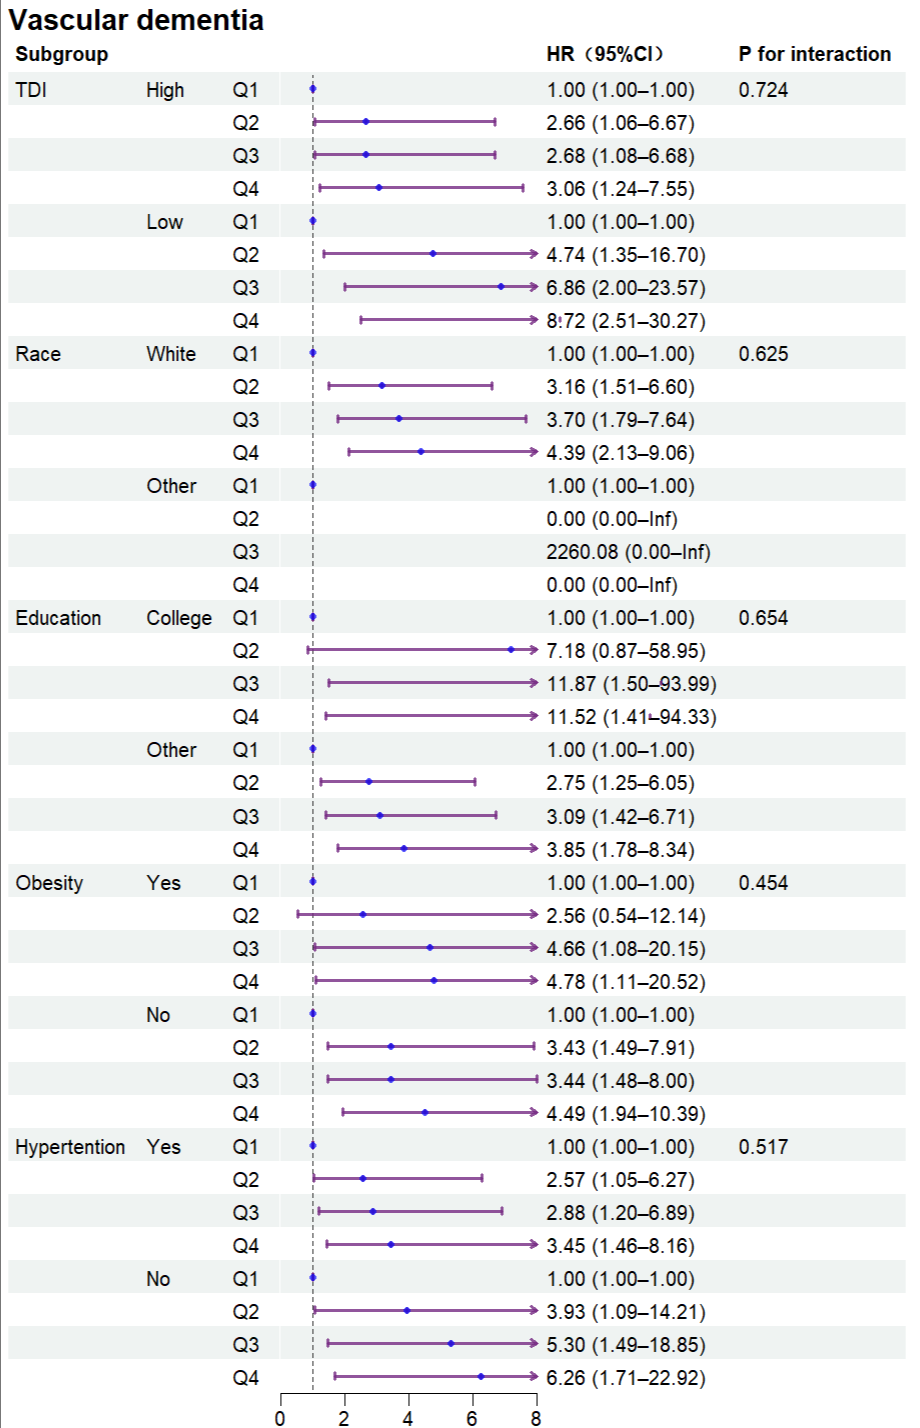


Abbreviations: HR = Hazard Ratio; CI = confidence interval; TDI= Townsend deprivation index

**Figure S19.** **Forest plot of coronary heart disease according to subgroups (ClivDlab).**


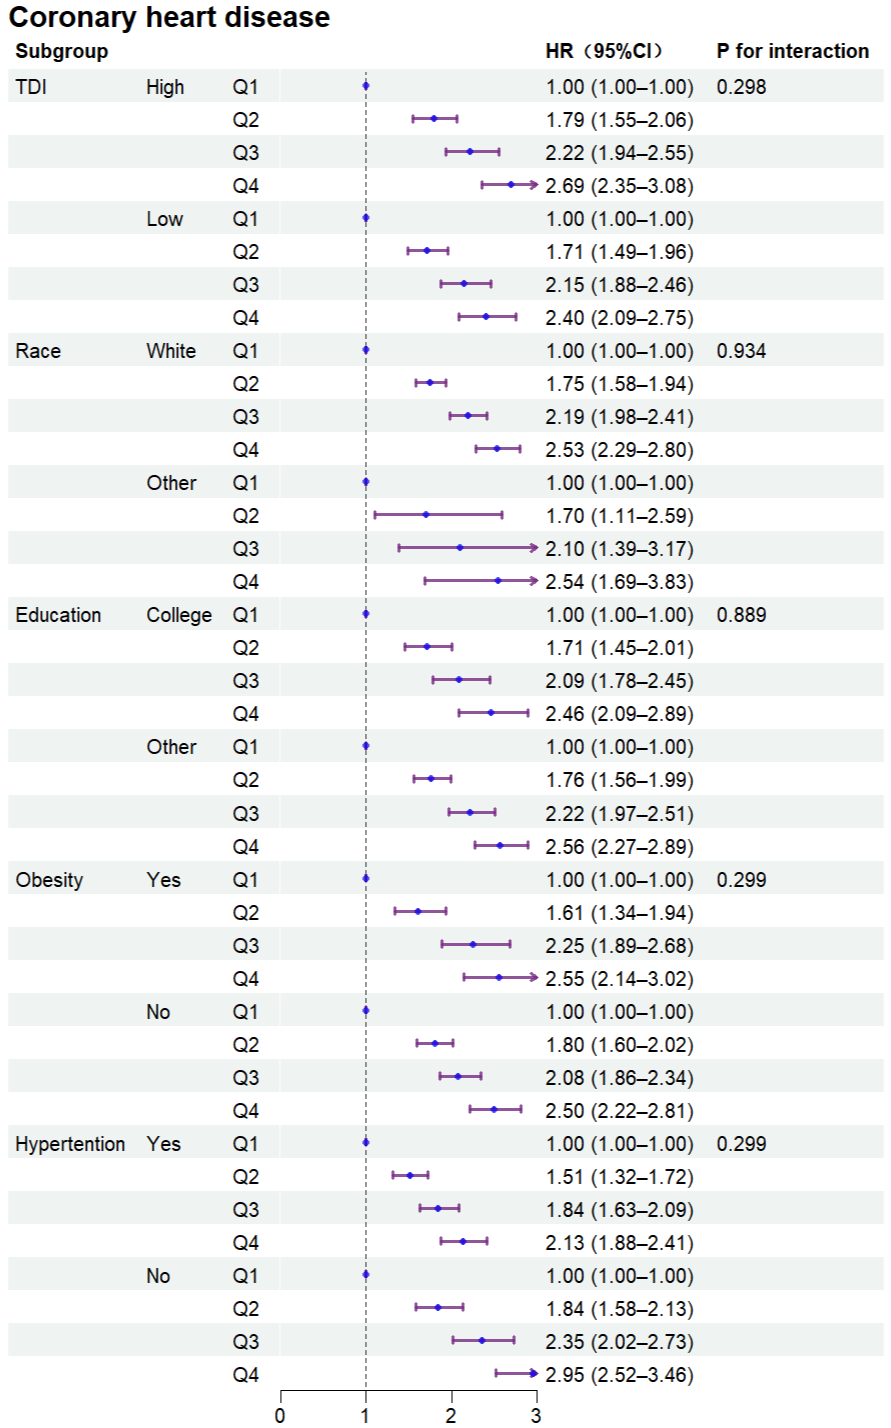


Abbreviations: HR = Hazard Ratio; CI = confidence interval; TDI= Townsend deprivation index

**Figure S20. Forest plot of coronary heart disease according to subgroups (ClivDnonlab).**


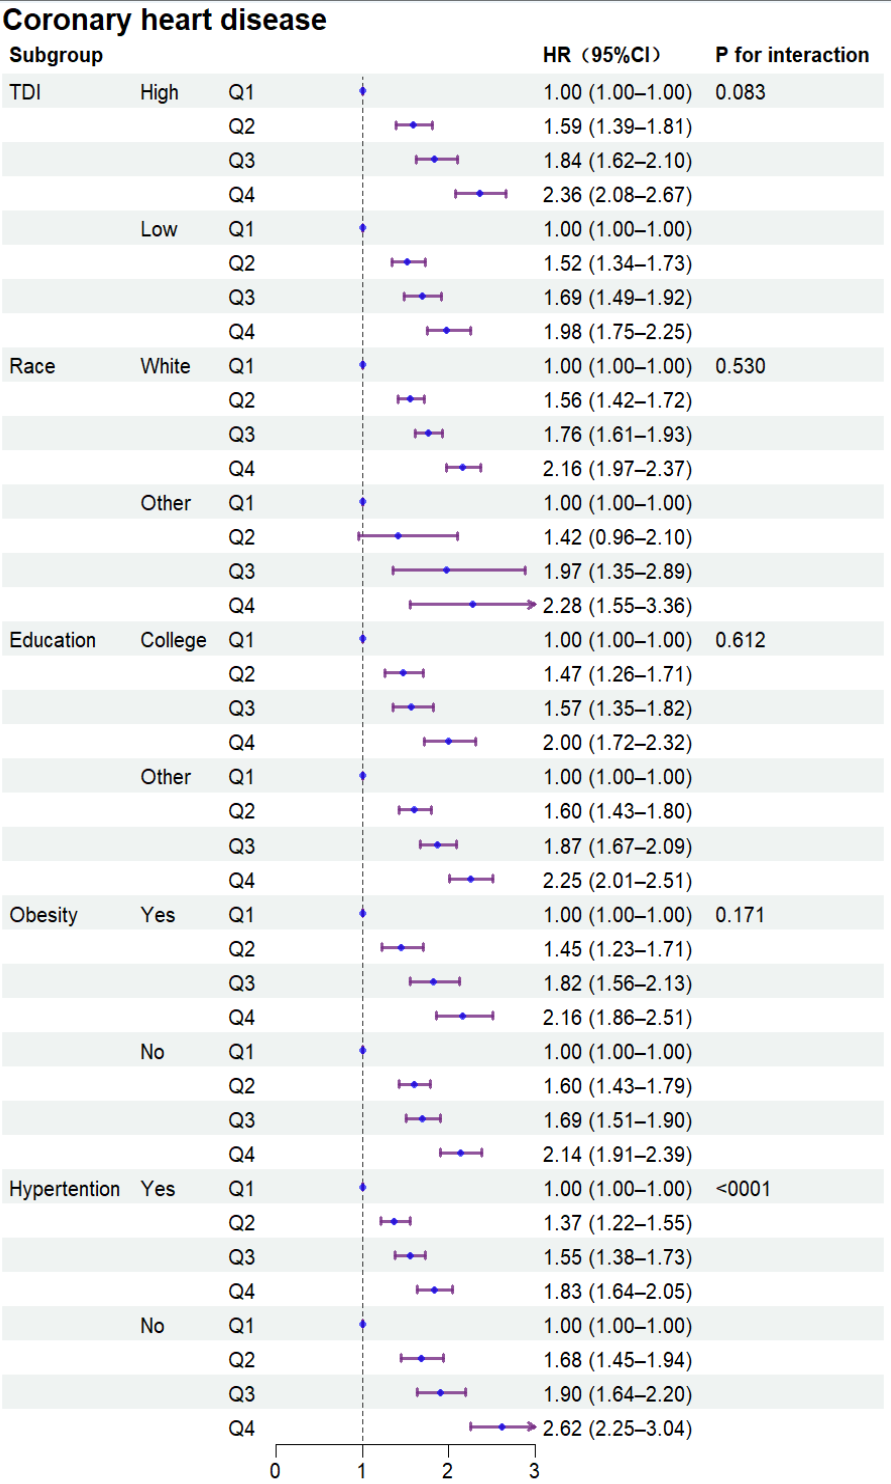
 Abbreviations: HR = Hazard Ratio; CI = confidence interval; TDI= Townsend deprivation index

**Figure S21. Forest plot of heart failure according to subgroups (ClivDlab).**


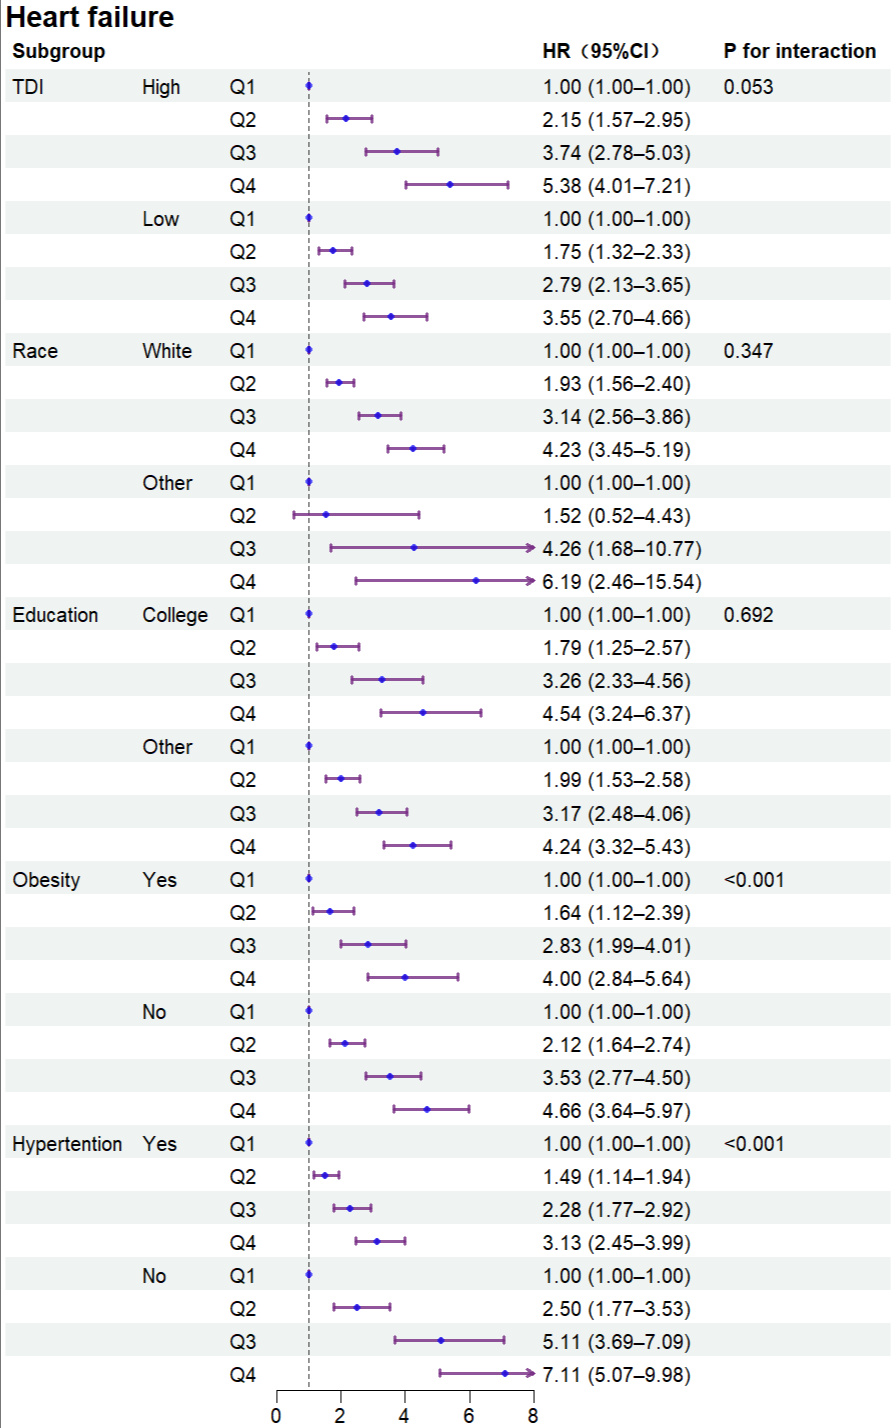


Abbreviations: HR = Hazard Ratio; CI = confidence interval; TDI= Townsend deprivation index

**Figure S22. Forest plot of heart failure according to subgroups (ClivDnonlab).**


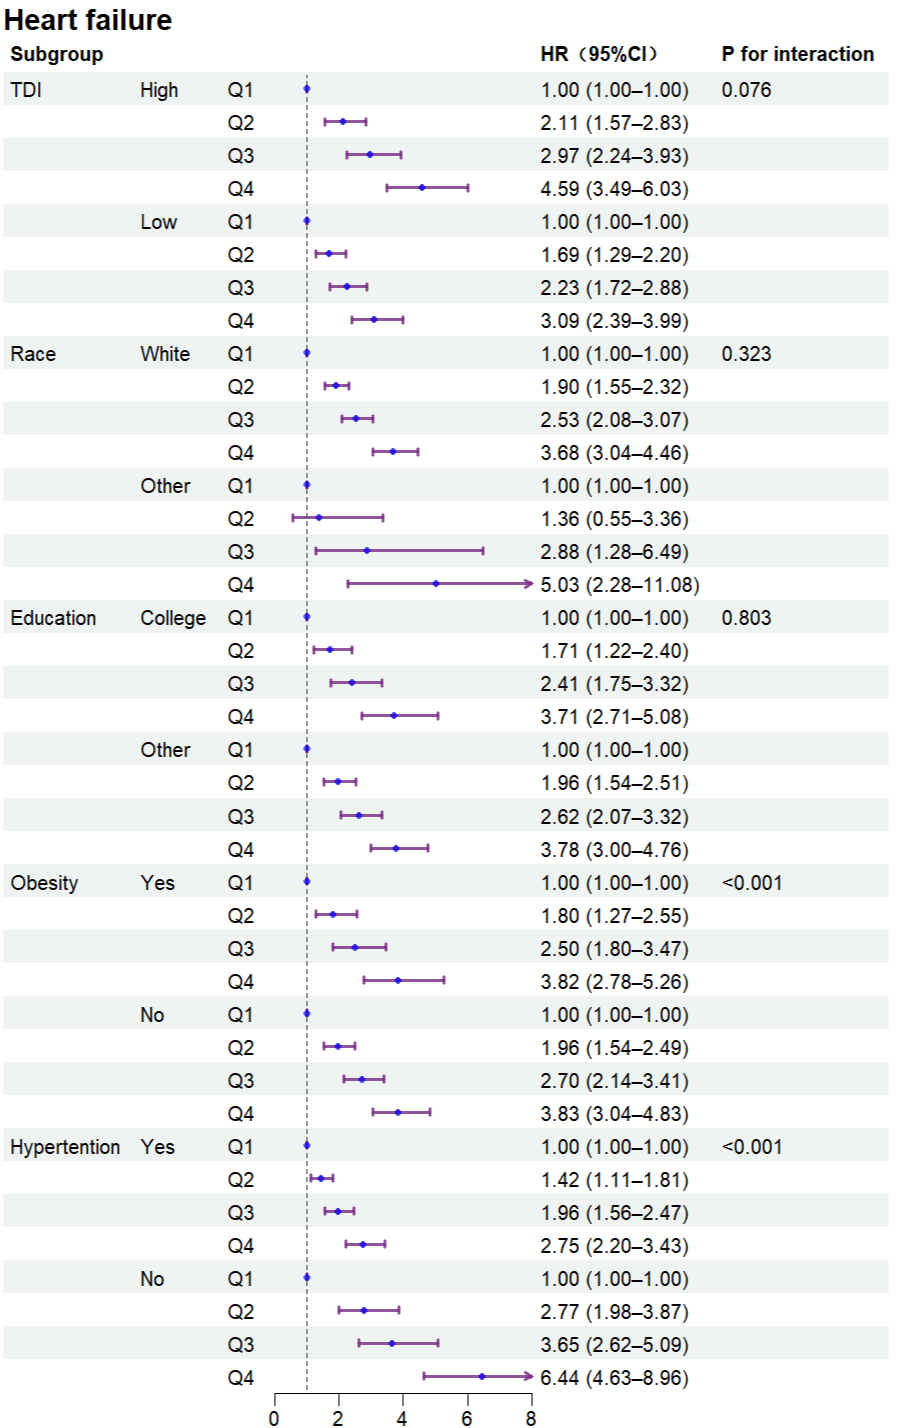


Abbreviations: HR = Hazard Ratio; CI = confidence interval; TDI= Townsend deprivation index

**Figure S23. Forest plot of stroke according to subgroups (ClivDlab).**


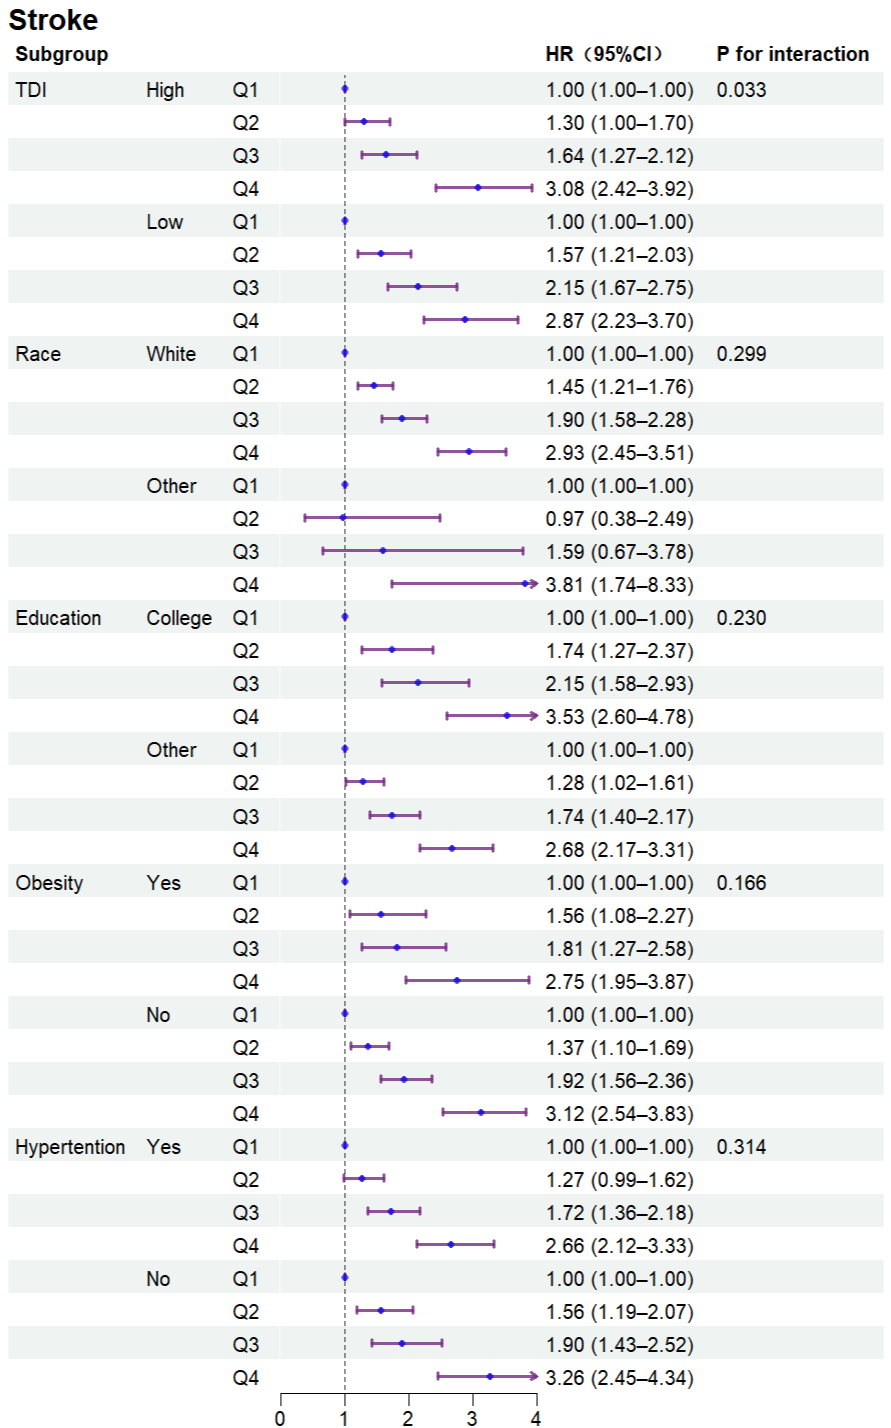


Abbreviations: HR = Hazard Ratio; CI = confidence interval; TDI= Townsend deprivation index

**Figure S24. Forest plot of stroke according to subgroups (ClivDnonlab).**


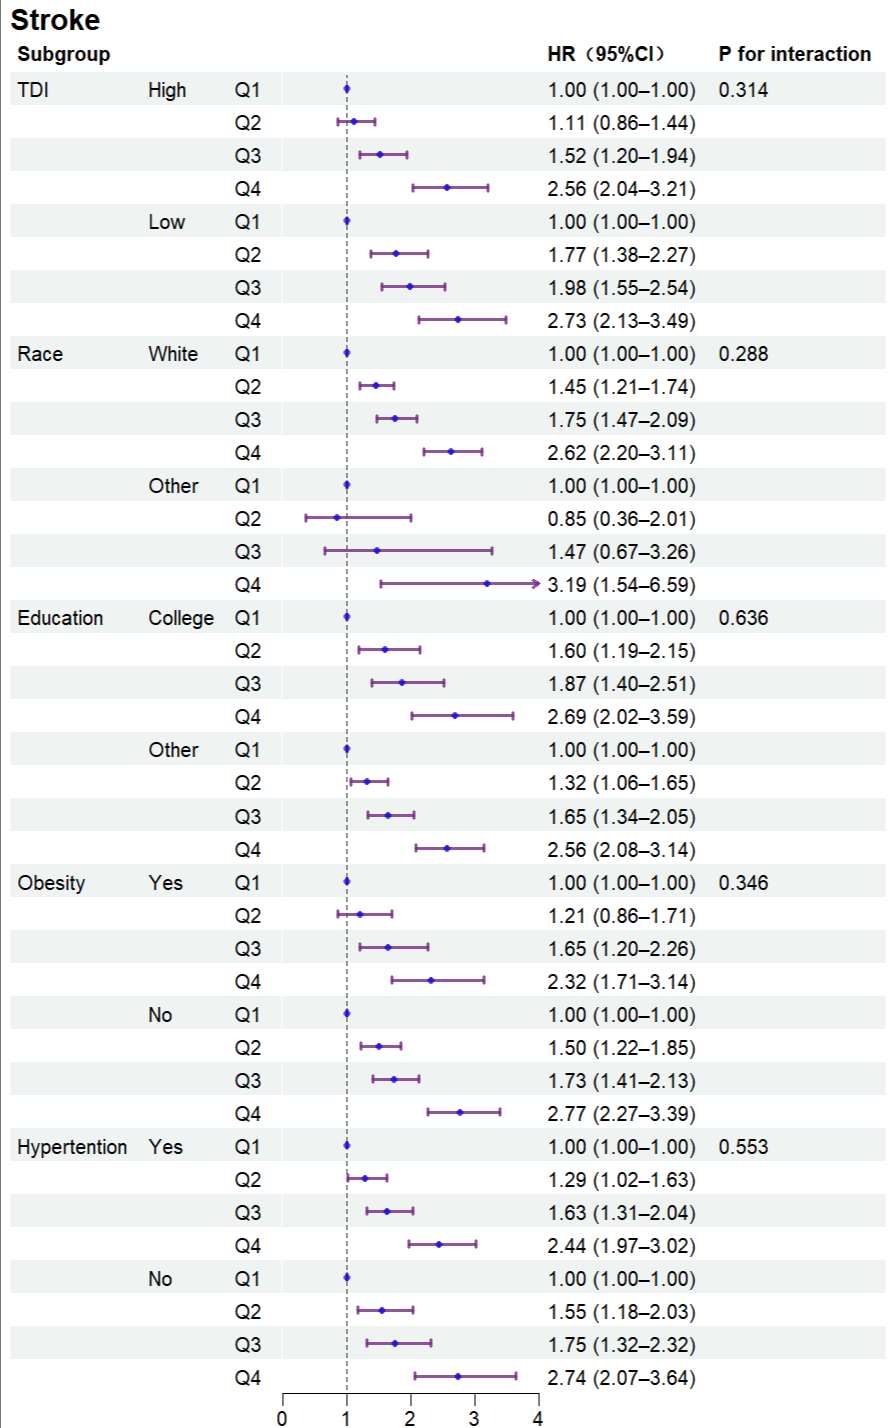


Abbreviations: HR = Hazard Ratio; CI = confidence interval; TDI= Townsend deprivation index

**eReferences**

1. Alcohol units. nhs.uk. Accessed June 9, 2020. <https://www.nhs.uk/live-well/alcohol-advice/calculating-alcohol-units/>

2. What Is Fortified Wine? Types, Benefits, and Downsides. . Accessed June 9, 2020. <https://www.healthline.com/nutrition/fortified-wine#types>
